# Supplementary material
Source: publisher figshare collection journal article supplement (https://gsajournals.figshare.com/ndownloader/files/24181793)
Supplement: Supplementary file 1 [file 24181793]

self	SNP1	SNP2	SNP3	SNP4	SNP5	SNP6	SNP7	SNP8	SNP9	SNP10	SNP11	SNP12	SNP13	SNP14	SNP15	SNP16	SNP17	SNP18	SNP19	SNP20	SNP21	SNP22	SNP23	SNP24	SNP25	SNP26	SNP27	SNP28	SNP29	SNP30	SNP31	SNP32	SNP33	SNP34	SNP35	SNP36	SNP37	SNP38	SNP39	SNP40	SNP41	SNP42	SNP43	SNP44	SNP45	SNP46	SNP47	SNP48	SNP49
380	2	0	0	2	0	2	1	2	0	1	1	0	2	2	2	2	2	0	2	0	0	0	0	0	0	0	0	0	0	0	0	2	0	0	0	0	0	2	2	2	2	0	2	2	2	0	0	0	1
381	2	0	0	2	2	2	0	1	0	0	0	0	2	2	2	2	2	0	2	2	2	2	2	2	0	0	2	2	2	0	0	2	0	0	0	0	0	2	2	2	2	2	2	2	2	0	2	2	2
384	2	0	0	2	0	2	1	2	0	0	1	0	1	1	1	1	1	0	1	0	0	0	0	0	0	0	0	0	0	0	0	0	0	0	1	1	0	2	2	2	2	0	2	2	0	0	0	0	0
382	0	0	1	0	0	0	2	2	0	0	2	0	0	0	1	2	0	0	2	0	0	0	0	0	0	0	1	1	0	0	2	0	0	1	0	0	0	0	0	0	0	2	2	2	2	0	2	2	2
383	2	2	2	0	2	2	0	0	0	0	0	0	2	2	2	2	2	0	2	0	0	0	0	0	0	0	0	0	0	0	0	2	2	0	2	2	2	2	2	2	1	2	2	2	2	0	2	2	2
385	2	0	1	0	0	2	0	1	0	0	0	0	2	2	2	2	2	0	2	0	0	0	0	0	0	0	0	0	0	0	0	2	0	0	0	0	0	2	2	2	1	1	2	2	2	1	0	0	2
389	2	2	2	0	0	2	0	2	0	0	0	0	0	1	2	2	0	0	2	0	0	0	0	0	0	0	0	0	0	0	0	2	0	0	1	1	1	2	2	2	0	0	2	2	2	2	0	0	2
390	2	1	1	1	0	2	0	1	0	0	0	0	1	1	1	1	1	0	1	0	0	0	1	1	1	1	2	0	0	0	0	2	0	0	0	0	0	2	2	2	2	0	2	2	2	2	0	0	2
386	2	0	1	0	0	2	0	2	0	0	0	0	0	0	2	2	0	1	2	2	2	0	0	0	0	0	0	0	0	0	0	2	0	0	0	0	0	2	2	2	2	0	0	0	0	0	0	0	2
387	2	0	0	2	2	1	1	2	1	0	1	0	2	2	2	2	2	0	2	0	0	0	1	2	2	2	2	2	2	0	0	2	0	0	0	0	0	2	2	2	2	2	2	2	2	0	2	2	0
388	2	0	1	1	0	1	1	2	1	0	1	0	2	2	2	2	2	0	2	0	0	0	0	0	0	0	0	0	0	0	0	2	0	0	0	0	0	2	2	2	2	1	2	2	2	1	1	1	2
391	2	2	2	0	0	2	1	2	1	0	1	0	2	2	2	2	0	0	2	0	0	0	0	0	0	0	0	0	0	0	0	2	0	0	2	2	2	2	2	2	0	0	0	0	0	0	0	0	2
393	2	0	0	2	2	1	2	2	0	0	2	1	1	1	2	2	1	1	2	0	0	0	0	0	0	0	0	0	0	0	0	2	0	0	0	0	0	0	0	0	0	0	2	2	1	0	0	0	2
394	2	0	0	2	1	0	2	2	2	0	2	0	1	1	1	1	1	0	1	0	0	0	1	0	0	0	1	1	1	1	1	1	0	0	0	0	0	2	2	2	2	0	2	2	2	1	1	1	2
395	2	0	0	2	0	1	1	0	0	0	0	0	2	2	2	2	2	0	2	0	0	0	0	0	0	0	0	0	0	0	0	2	0	0	0	0	0	2	2	2	2	0	1	1	0	0	0	0	2
398	2	0	1	1	0	2	0	2	0	0	0	0	0	0	2	2	0	2	2	0	0	0	1	1	1	0	1	1	1	0	0	0	0	0	0	0	0	2	2	2	2	1	1	1	1	0	1	1	2
399	2	0	0	1	0	0	2	2	0	0	2	0	1	1	2	2	0	0	2	1	1	0	0	0	0	0	1	1	0	1	0	1	0	0	0	0	0	2	2	2	2	0	2	0	1	0	0	0	2
402	2	0	0	2	2	1	2	2	1	1	2	0	1	1	2	2	1	1	2	2	0	0	0	0	0	0	0	0	0	0	0	2	2	0	0	0	0	2	2	2	2	0	0	0	0	0	0	0	2
403	0	0	2	0	0	2	1	2	0	0	1	0	2	1	2	2	2	0	2	0	0	0	0	0	0	0	0	0	0	0	0	2	0	0	0	0	0	2	2	2	2	0	0	0	0	0	0	0	2
404	2	0	0	2	1	1	1	2	0	0	0	1	2	2	2	2	2	0	2	0	0	0	0	0	0	0	0	0	0	2	0	2	2	0	0	0	0	2	2	2	2	2	2	2	2	0	2	2	2
405	1	0	0	2	0	2	0	2	0	0	0	0	1	1	1	1	1	0	1	0	0	0	0	1	0	0	0	0	0	0	0	1	0	0	2	2	0	2	2	2	2	2	2	2	2	0	0	0	2
406	1	2	2	0	0	2	1	2	0	1	1	0	0	0	2	2	0	1	2	0	0	0	1	0	0	0	1	1	1	0	0	2	0	0	0	0	0	2	2	2	2	1	1	1	1	0	1	1	2
407	2	0	0	2	0	2	1	1	0	1	1	1	1	1	2	2	1	1	2	0	0	0	0	0	0	0	0	0	0	0	0	2	0	0	1	1	0	2	2	2	2	0	2	0	1	0	0	0	2
410	1	0	0	1	0	0	1	1	1	0	1	0	2	2	2	2	2	0	2	0	0	0	0	0	0	0	0	0	0	0	0	2	0	0	0	0	0	2	2	2	2	0	1	1	1	1	0	0	2
392	0	0	1	0	0	0	2	2	0	0	2	0	0	0	0	2	0	0	2	0	0	0	0	1	1	0	2	0	0	1	2	0	0	0	0	0	0	0	0	0	0	0	1	1	1	1	0	0	2
396	2	0	0	2	0	2	0	1	0	0	0	0	1	1	1	1	1	0	1	0	0	0	0	0	0	0	0	0	0	0	0	2	0	0	0	0	0	2	2	2	2	0	2	2	2	0	0	1	2
397	2	0	0	2	0	1	1	2	0	0	0	1	1	1	2	2	1	1	2	0	0	0	1	1	1	1	1	1	1	0	0	2	1	0	0	0	0	2	0	2	2	0	2	2	2	2	0	0	2
400	2	0	0	2	0	2	0	1	0	0	0	0	2	2	2	2	2	0	2	0	0	0	0	0	0	0	0	0	0	0	0	0	0	0	1	0	0	2	2	2	2	0	2	0	0	0	0	0	2
401	2	0	0	2	0	2	0	2	0	0	0	0	1	1	2	2	1	1	2	0	0	0	0	0	0	0	0	0	0	0	0	2	1	0	0	0	0	2	2	2	2	0	2	2	2	2	0	0	2
408	2	1	1	0	0	2	1	1	0	1	1	0	2	2	2	2	2	0	2	0	0	0	0	0	0	0	0	0	0	0	0	2	1	0	1	0	0	2	2	2	0	0	0	2	1	0	0	0	2
409	2	0	0	0	0	2	1	2	0	0	1	2	2	2	2	2	2	0	2	0	0	0	0	0	0	0	0	0	0	0	0	2	0	0	0	0	0	2	2	2	2	0	0	2	1	0	0	0	2
411	0	0	0	2	0	0	2	2	1	0	2	0	2	2	2	2	2	0	2	0	0	0	0	2	2	0	2	2	0	0	2	0	2	2	2	2	2	2	2	2	2	0	2	2	2	2	0	0	2
412	2	0	1	2	0	0	2	2	1	0	2	0	2	2	2	2	2	0	2	0	0	0	0	0	0	0	0	0	0	0	0	2	0	0	2	2	2	2	2	2	0	0	2	2	1	2	0	0	2
413	2	0	0	2	0	2	0	2	0	0	0	0	2	1	2	2	2	0	2	0	0	0	1	1	1	1	0	0	0	0	0	2	0	0	0	0	0	2	2	2	2	0	2	2	1	1	0	0	2
414	2	0	0	2	1	2	0	1	0	0	0	0	0	0	1	1	0	1	1	0	1	0	0	0	0	0	0	0	0	0	0	2	0	0	0	0	0	2	2	2	0	0	2	2	1	0	0	0	2
415	2	0	0	0	0	2	1	2	0	1	1	0	2	2	2	2	2	0	2	0	0	0	0	0	0	0	0	0	0	0	0	2	0	0	0	0	0	2	0	2	1	0	2	2	2	0	0	0	2
416	2	0	0	2	0	1	1	2	1	0	1	0	2	1	2	2	1	0	2	0	0	0	0	0	0	0	0	0	0	0	0	2	0	2	0	0	0	2	2	2	2	0	2	2	2	2	0	0	2
418	2	1	0	1	0	2	0	2	0	0	0	0	1	1	2	2	1	1	2	0	0	0	0	0	0	0	0	0	0	0	0	2	2	0	0	0	0	2	2	2	2	0	1	1	1	1	0	0	2
419	2	0	0	2	2	2	1	2	0	0	1	0	0	0	0	0	0	0	0	1	1	0	0	0	0	0	0	0	0	0	0	2	0	0	0	0	0	2	2	2	2	0	2	2	2	0	0	0	2
420	2	0	0	2	0	1	1	2	0	0	1	0	2	2	2	2	2	0	2	0	0	0	0	0	0	0	0	0	0	0	0	2	0	0	0	0	0	2	2	2	2	1	2	2	2	0	1	1	2
422	0	0	2	0	0	2	1	2	0	1	1	0	0	0	2	2	0	1	2	0	0	0	0	0	0	0	1	1	1	0	0	2	0	0	0	0	0	2	2	2	1	0	0	0	0	0	0	0	1
425	2	0	1	1	0	1	1	2	0	0	1	1	2	2	2	2	2	0	2	0	0	0	0	0	0	0	0	0	0	0	0	2	1	0	0	0	0	0	0	0	0	0	0	0	1	2	0	0	2
426	2	0	1	1	0	2	0	2	0	0	0	0	0	1	2	2	2	2	2	1	0	0	1	0	0	0	1	1	1	0	0	2	0	0	1	1	0	2	2	2	1	0	2	2	2	2	0	0	2
427	2	1	1	0	0	2	1	2	0	0	0	0	2	2	2	2	2	0	2	1	1	0	1	1	0	0	1	1	1	0	0	2	0	0	0	0	0	2	2	2	2	0	1	1	1	0	0	0	2
429	2	0	0	1	0	1	1	2	0	0	1	0	0	0	2	2	0	0	2	0	0	0	0	0	0	0	1	1	0	0	0	1	0	0	0	0	0	2	2	2	2	0	0	0	0	0	0	0	2
430	0	0	0	2	0	1	1	2	1	0	1	1	1	1	2	2	1	1	2	1	1	1	2	2	2	2	2	2	2	0	0	2	0	0	0	0	0	2	2	2	2	0	2	2	2	2	0	0	2
431	2	0	0	2	0	2	1	2	0	0	1	0	1	1	2	2	2	0	2	1	1	1	0	0	0	0	0	0	0	0	0	2	0	0	1	1	1	2	2	2	2	0	2	2	2	2	0	0	2
433	2	0	0	2	0	2	1	2	0	1	1	0	0	1	2	2	0	0	0	1	1	0	0	0	0	0	0	0	0	0	0	2	1	0	0	0	0	2	2	2	2	0	2	2	2	0	2	0	2
434	2	0	0	2	0	2	0	2	0	0	0	0	1	1	2	2	1	1	2	0	0	0	0	0	0	0	0	0	0	0	0	2	0	0	0	0	0	2	2	2	2	1	2	2	2	1	1	1	2
417	2	0	0	2	0	2	1	2	0	0	1	0	1	1	2	2	1	1	2	0	0	0	0	0	0	0	0	0	0	0	0	2	0	0	0	1	1	2	2	2	2	0	2	2	1	0	0	0	2
421	2	0	0	0	0	0	2	2	2	0	2	0	1	1	1	1	1	0	1	0	0	0	1	0	0	0	1	1	1	0	0	2	0	0	0	0	0	2	2	2	1	0	1	1	1	1	0	0	2
423	2	0	0	2	0	2	0	1	0	0	0	0	1	1	2	2	1	1	2	0	2	0	0	0	0	0	0	0	0	0	0	2	0	0	1	1	1	2	2	2	2	0	0	0	0	0	0	0	2
424	2	0	0	2	0	0	1	2	1	0	1	0	1	1	2	2	1	1	2	0	0	0	0	0	0	0	0	0	0	0	0	2	0	0	0	0	0	2	2	2	2	2	2	2	2	0	2	2	2
428	2	0	0	2	0	0	2	2	0	0	2	0	1	1	1	1	1	0	1	0	0	0	0	0	0	0	0	0	0	0	0	2	0	0	0	0	0	2	2	2	2	0	2	2	1	0	0	0	2
432	2	0	0	2	0	1	1	2	0	0	1	0	2	2	2	2	2	0	2	0	0	0	0	0	0	0	1	1	0	0	0	2	0	0	2	2	2	2	2	2	2	0	0	0	0	0	0	0	2
435	2	1	1	2	1	2	0	2	0	0	0	0	2	1	2	2	0	0	2	0	0	0	1	0	0	0	1	1	1	0	0	2	0	0	0	0	0	2	2	2	2	0	1	1	1	0	0	0	2
436	0	0	0	1	0	0	2	2	0	0	2	0	2	2	2	2	2	0	2	0	0	0	2	2	0	1	2	2	2	0	2	0	2	0	0	0	0	2	2	2	2	0	0	0	1	0	0	0	2
437	2	0	0	0	0	2	1	2	0	2	0	0	0	0	2	2	0	2	2	1	1	0	1	0	0	0	0	0	0	0	0	2	2	0	0	0	0	2	2	2	2	2	2	2	1	0	0	0	2
438	2	0	0	2	0	1	1	2	0	0	0	0	0	1	2	2	0	0	0	0	0	0	0	0	0	0	0	0	0	0	0	2	0	0	2	0	0	2	2	2	2	0	2	2	0	0	0	0	2
439	1	0	2	0	0	2	0	0	0	0	0	0	0	1	2	2	1	1	1	0	0	0	1	1	1	1	1	1	1	0	0	2	1	0	0	0	0	2	2	2	2	0	0	0	0	0	0	0	2
440	0	0	0	2	0	0	2	2	1	0	2	0	2	2	2	2	2	0	2	0	0	0	0	2	2	0	2	2	0	0	2	0	2	0	2	2	2	2	2	1	1	0	0	0	0	0	0	0	2
442	2	0	0	1	0	2	1	2	0	0	1	0	2	2	2	2	2	0	2	0	0	0	1	1	1	1	2	0	0	0	0	2	0	0	2	0	0	2	2	2	2	0	0	0	0	0	0	0	2
443	2	0	0	0	0	2	1	2	0	0	0	0	2	2	2	2	2	0	2	0	0	0	0	0	0	0	0	0	0	0	0	2	1	0	0	0	0	2	2	2	0	1	1	1	1	0	1	1	2
445	0	0	2	0	0	0	2	2	0	0	2	0	0	0	1	1	0	0	2	1	1	1	0	0	0	0	0	0	0	0	0	2	2	0	0	0	0	0	0	0	2	0	2	0	1	0	0	0	2
446	1	2	2	0	0	2	0	2	0	0	0	0	2	2	2	2	0	0	2	1	1	1	1	1	1	1	1	1	1	0	0	2	0	0	0	1	0	2	2	2	1	0	0	0	0	0	0	0	0
447	2	0	0	2	0	2	1	2	0	0	0	1	2	2	2	2	1	0	2	0	0	0	0	0	0	0	0	0	0	1	0	2	0	0	1	1	1	2	2	2	2	0	0	0	0	0	0	0	2
448	2	1	1	1	0	2	0	2	0	0	0	0	0	0	2	2	0	2	2	0	0	0	0	0	0	0	0	0	0	0	0	2	0	0	0	0	0	2	2	2	2	1	1	1	1	0	1	1	2
449	2	0	0	2	0	1	1	2	0	0	1	0	0	0	1	1	0	1	1	0	0	0	0	0	0	0	0	0	0	0	0	2	2	0	0	0	0	2	2	2	2	0	1	1	1	1	0	0	2
450	2	0	0	2	0	0	1	1	1	0	1	0	0	0	0	0	0	0	0	0	0	0	0	0	0	0	0	0	0	0	0	2	0	0	0	0	0	2	2	2	2	0	0	2	1	1	0	0	2
451	2	0	0	2	0	0	2	2	0	0	2	0	2	1	2	2	1	0	2	0	0	0	0	0	0	0	0	0	0	0	0	2	0	0	0	0	0	2	2	2	2	0	2	2	1	0	0	0	2
452	2	0	0	2	0	2	0	2	0	0	0	0	2	2	2	2	2	0	2	2	2	0	0	0	0	0	0	0	0	0	0	2	0	0	0	0	0	2	2	2	2	0	0	0	0	0	0	0	1
454	2	0	1	0	0	2	1	2	0	0	1	0	2	1	2	2	1	0	2	0	0	0	1	1	2	0	1	1	1	0	0	2	0	0	0	0	0	2	2	2	2	0	0	0	0	0	0	0	2
455	2	0	1	0	0	2	1	1	0	1	1	0	1	1	2	2	1	1	2	2	2	0	0	0	0	0	0	0	0	0	0	2	1	0	0	0	0	2	2	2	2	0	2	2	2	2	0	0	2
456	1	0	0	2	0	0	0	2	0	0	0	0	1	1	1	1	0	0	2	0	0	0	2	2	0	0	2	2	2	0	0	2	0	0	0	0	0	2	2	2	2	0	1	1	1	1	0	0	2
457	2	0	0	1	0	2	1	2	0	1	1	1	1	1	1	1	1	0	1	0	0	0	0	0	0	0	0	0	0	0	0	2	2	0	0	0	0	2	1	2	0	0	2	2	2	0	0	0	2
458	2	0	0	1	0	2	1	2	0	0	2	0	0	0	2	2	0	0	2	0	0	0	1	1	1	1	0	0	2	0	0	2	0	0	0	0	0	2	2	2	0	0	2	2	1	2	0	0	2
460	0	0	1	1	0	1	1	2	0	0	1	1	1	1	2	2	1	1	2	0	0	0	0	0	0	0	0	0	0	0	0	2	0	0	0	0	0	2	2	2	2	0	2	2	1	0	0	2	2
463	2	0	2	0	0	0	2	2	0	0	2	0	0	1	2	2	0	0	2	2	0	0	0	0	0	0	0	0	0	0	0	2	0	0	0	0	0	2	2	2	2	0	2	2	2	0	0	0	2
467	2	0	0	2	0	2	0	2	0	0	0	0	1	1	2	2	1	1	2	0	0	0	0	0	0	0	0	0	0	0	0	2	1	0	0	0	0	2	2	2	2	0	2	0	0	0	0	0	2
468	2	0	0	2	0	2	1	2	0	0	2	0	0	0	2	2	0	1	2	1	1	1	0	0	0	0	0	0	0	0	0	2	0	0	1	1	1	2	2	2	2	0	2	0	1	0	0	0	2
471	2	0	0	2	0	0	2	2	2	0	2	0	1	1	1	1	1	0	1	0	0	0	0	0	0	0	0	0	0	0	0	2	0	0	1	1	1	2	2	2	0	1	2	2	2	0	0	0	2
472	2	0	0	2	0	1	1	2	1	0	1	0	0	0	0	0	0	0	0	0	0	0	1	1	1	1	0	1	0	0	0	2	0	0	0	0	0	2	2	2	2	0	2	2	2	2	2	0	2
473	2	0	2	0	0	2	1	2	0	0	1	0	0	0	2	2	0	2	2	0	0	0	0	0	0	0	0	0	0	0	0	2	0	0	0	0	0	2	2	2	2	0	2	2	1	0	0	0	2
474	2	0	0	2	0	2	1	2	1	0	2	0	2	2	2	2	2	0	2	0	0	0	0	0	0	0	0	0	0	0	0	1	0	0	0	0	0	2	2	2	2	0	2	2	2	0	0	0	2
476	2	1	1	2	0	2	0	2	0	0	0	0	2	2	2	2	0	0	2	1	1	0	1	0	1	1	1	1	1	0	0	2	1	0	0	2	0	2	2	2	2	0	2	0	1	0	0	0	2
477	2	0	0	2	0	2	0	1	0	0	0	0	2	1	2	2	1	0	0	0	0	0	0	0	0	0	0	0	0	0	0	2	0	0	0	0	0	2	2	2	0	0	2	2	2	0	0	0	2
480	2	0	0	1	0	2	0	2	0	0	0	0	1	1	2	2	1	0	2	2	2	0	1	1	1	1	2	2	2	0	0	2	0	0	1	1	1	2	2	2	2	0	0	0	0	0	0	0	2
482	2	0	0	2	0	2	0	2	0	0	0	0	0	0	1	1	0	1	1	0	0	0	0	0	0	0	0	0	0	0	0	2	0	0	0	0	0	2	2	2	2	0	0	0	0	0	0	0	2
483	1	0	0	1	1	2	0	2	0	0	0	0	2	2	2	2	2	0	2	0	0	0	0	0	0	0	0	0	0	0	0	2	0	0	0	0	0	2	2	2	2	0	2	2	2	2	0	0	2
441	0	1	1	1	0	1	1	2	0	0	1	0	0	1	2	2	2	0	2	0	0	0	0	0	0	0	0	0	0	0	0	2	0	0	0	0	0	2	2	2	2	0	0	0	0	0	0	0	2
444	2	0	0	2	0	2	1	2	0	0	2	0	2	2	2	2	2	0	2	0	0	0	0	0	0	0	0	0	0	0	0	2	0	0	0	0	0	2	2	2	2	0	2	2	2	0	0	0	2
453	2	0	0	2	0	2	0	2	0	0	0	0	0	0	2	2	0	2	2	0	0	0	1	2	2	2	2	2	2	0	0	2	0	0	0	0	0	2	2	2	2	0	1	1	1	0	0	0	2
459	2	0	0	1	0	2	1	2	0	1	1	0	0	0	2	2	0	2	2	1	1	0	0	0	0	0	0	0	0	0	0	2	0	0	0	0	0	2	2	2	2	0	0	0	0	0	0	0	2
461	2	0	0	2	0	1	1	2	0	0	1	0	0	1	2	2	1	0	2	0	0	0	1	1	1	1	0	0	0	0	0	2	0	0	1	1	1	2	2	2	2	0	1	1	1	0	0	0	2
462	2	0	1	0	0	1	1	1	1	0	1	0	0	1	2	2	2	0	2	0	0	1	0	2	2	0	2	2	0	1	1	0	0	2	0	0	0	2	2	2	2	0	1	1	1	0	1	1	2
464	0	1	1	0	0	1	1	2	1	0	1	0	2	2	2	2	1	0	2	1	1	0	1	0	0	0	1	1	1	0	0	2	1	0	0	0	0	2	2	2	1	0	1	1	1	1	0	0	2
465	1	0	0	2	0	1	1	2	0	0	1	1	1	1	1	1	2	0	0	0	0	0	0	0	0	0	0	0	0	0	0	1	0	0	0	0	0	2	2	2	2	0	2	2	2	1	0	0	2
466	2	0	0	2	0	2	0	2	0	0	0	0	1	1	1	1	1	0	1	0	0	0	0	0	0	0	0	0	0	0	0	0	0	0	0	0	0	2	2	2	1	0	2	2	2	2	0	0	2
469	2	0	2	0	0	1	1	2	0	0	1	0	1	1	1	1	1	0	1	1	0	0	0	0	0	0	0	2	0	1	0	1	0	0	0	0	0	2	2	2	2	0	2	2	1	0	0	0	2
470	2	0	0	2	2	1	1	2	0	0	0	1	2	2	2	2	2	0	2	2	0	0	1	0	2	0	1	1	1	0	0	2	0	0	1	1	0	2	2	2	2	0	0	2	1	2	0	0	2
475	2	0	0	2	0	2	0	2	0	0	0	0	1	1	2	2	1	1	2	0	0	0	0	0	0	0	0	0	0	0	0	2	0	0	0	0	0	2	2	2	2	0	0	0	0	0	0	0	2
478	2	0	0	1	0	1	1	1	0	0	1	0	2	2	2	2	2	0	2	0	0	0	0	0	0	0	0	0	0	0	0	2	0	0	1	1	1	2	2	2	2	0	2	2	1	0	0	0	2
479	2	0	0	2	0	2	1	1	1	0	1	0	0	0	2	2	0	0	2	0	0	0	0	0	0	0	2	2	0	1	0	1	0	0	2	2	2	2	2	2	2	0	2	0	1	0	0	0	2
481	2	0	0	0	0	1	1	2	0	0	1	0	1	1	2	2	0	0	2	0	0	0	1	0	0	0	1	1	1	0	0	2	0	0	0	0	0	2	2	2	2	0	0	0	0	0	0	0	2
484	2	0	0	0	0	0	2	2	0	0	2	0	0	0	2	2	0	2	2	0	0	0	1	1	0	0	0	0	0	0	0	2	1	0	0	0	0	2	2	2	2	0	2	2	2	2	0	0	2
485	2	0	2	2	0	0	2	2	2	0	2	0	2	1	2	2	0	0	2	0	0	0	0	0	0	0	0	0	0	0	0	2	0	0	0	0	0	2	2	2	0	0	2	2	2	0	1	2	2
486	2	0	1	0	0	1	1	2	0	0	1	0	0	0	2	2	0	0	2	0	0	0	2	2	2	2	1	1	1	0	0	2	0	0	0	0	0	2	2	2	2	0	0	2	1	0	0	0	2
492	2	0	0	2	0	2	0	1	0	0	0	0	1	1	2	2	1	1	2	0	0	0	0	0	0	0	0	0	0	0	0	2	0	0	0	0	0	2	2	2	2	0	2	1	0	0	0	0	2
496	1	0	1	1	0	2	0	1	0	0	0	0	0	1	1	2	1	0	1	0	0	0	0	0	0	0	0	0	0	0	0	2	0	0	0	0	0	2	2	2	1	2	2	2	2	0	2	2	2
502	2	0	0	0	0	2	0	2	0	0	0	0	2	2	2	2	2	0	2	1	1	1	1	1	1	1	1	1	1	0	0	2	1	2	0	0	0	0	2	1	1	0	0	0	0	0	0	0	0
503	2	0	1	2	0	2	2	2	0	1	2	0	2	2	2	2	0	0	2	0	0	0	1	1	1	1	0	2	0	0	0	2	1	0	0	0	0	2	2	2	2	0	2	2	1	0	0	0	2
504	2	1	2	0	0	0	1	2	0	0	1	0	2	2	2	2	2	0	2	0	0	2	0	0	0	0	0	0	0	0	0	2	0	0	0	0	0	2	2	2	2	0	0	0	0	0	0	0	2
506	2	0	0	2	0	2	1	2	1	0	2	1	1	1	1	1	1	0	1	0	0	0	0	0	0	0	0	0	0	2	0	0	0	0	0	0	0	2	2	2	2	0	0	0	0	0	0	0	2
507	2	0	2	2	0	1	1	2	1	0	1	0	0	2	2	2	2	0	2	0	0	0	0	0	0	0	0	0	0	0	0	2	0	0	0	0	0	2	2	2	2	0	2	2	2	0	0	2	2
508	2	0	0	2	0	1	1	2	0	0	1	0	0	0	0	0	0	0	0	0	0	0	0	0	0	0	0	0	0	0	0	2	1	0	1	1	0	2	2	2	2	0	1	1	1	0	0	0	2
511	2	0	1	2	0	2	0	2	0	0	0	0	2	2	2	2	2	0	2	0	0	0	0	0	0	0	0	0	0	0	0	2	0	0	0	0	0	2	2	2	2	0	2	2	2	0	1	1	2
515	2	0	0	1	0	0	2	2	0	0	2	0	2	1	2	2	0	0	2	0	0	0	0	0	0	0	0	0	0	1	1	1	0	1	0	0	2	0	0	0	2	0	2	2	2	0	2	0	2
518	2	0	0	1	0	2	1	1	0	1	1	0	0	0	0	0	0	0	2	0	0	0	0	0	0	0	0	0	0	0	0	2	2	0	0	0	0	2	2	2	0	0	2	0	1	0	0	0	2
519	2	0	0	2	0	2	0	2	0	0	0	0	2	2	2	2	1	0	2	0	0	0	0	0	0	0	0	0	0	0	0	2	0	0	0	0	0	2	2	2	1	0	1	1	1	1	0	0	2
520	2	0	0	1	0	1	1	2	0	0	1	0	0	0	2	2	0	2	2	2	2	0	0	0	0	0	0	0	0	0	0	2	0	0	0	0	0	2	2	2	2	0	0	0	0	0	0	0	2
523	0	0	2	0	0	1	1	1	0	0	0	0	1	1	1	1	1	0	2	2	2	2	0	2	2	0	2	2	0	1	1	0	1	2	0	0	0	2	2	2	2	2	2	2	1	0	2	0	2
487	2	0	0	0	0	2	1	2	0	1	1	0	1	1	2	2	1	1	2	0	0	0	0	0	0	0	0	0	0	0	0	2	0	0	0	0	0	0	2	1	1	0	2	2	2	2	0	0	2
488	2	0	0	2	0	1	1	2	1	0	1	0	0	0	2	2	0	2	2	0	2	0	1	0	0	0	2	0	2	0	0	2	0	0	0	0	0	2	2	2	2	0	0	2	1	0	0	0	2
489	1	0	0	2	2	2	0	2	0	0	0	1	2	2	2	2	2	0	2	0	0	0	1	2	2	1	2	2	1	2	0	0	0	0	0	0	0	2	2	2	2	0	0	2	1	0	0	2	2
490	2	1	1	1	1	2	1	2	0	0	1	0	2	2	2	2	2	0	2	0	0	0	0	0	0	0	0	0	0	0	0	2	0	0	0	0	0	0	2	2	0	1	1	1	1	0	1	1	2
491	2	0	0	2	0	2	1	2	0	0	2	0	2	2	2	2	2	0	2	0	0	0	1	2	2	0	2	2	1	1	0	1	0	0	0	0	0	2	2	2	2	2	2	2	2	0	2	2	2
493	2	0	1	1	0	2	0	1	0	0	0	0	2	1	0	2	2	0	2	0	0	0	0	0	0	0	0	0	0	0	0	2	1	0	0	0	0	2	2	2	2	2	2	2	2	0	2	2	2
494	1	0	2	2	0	2	1	2	0	0	1	1	1	1	1	1	1	0	1	2	2	1	1	1	1	1	1	1	1	0	2	0	2	0	0	0	0	2	2	2	2	1	1	1	1	0	1	1	2
495	2	1	2	0	0	2	1	2	0	0	1	0	2	2	2	2	2	0	2	2	2	2	0	0	0	0	0	0	0	0	0	2	0	0	0	1	1	2	2	2	2	0	0	0	0	0	0	0	2
497	2	0	1	2	0	2	0	0	0	0	0	0	2	2	2	2	2	0	2	2	2	0	0	0	0	0	1	1	1	0	0	2	0	2	0	0	0	2	0	2	2	0	2	2	2	0	0	0	2
498	2	0	0	2	0	2	1	2	0	0	2	2	2	2	2	2	2	0	2	0	0	0	0	0	0	0	0	0	0	0	0	2	2	0	0	0	0	2	2	2	2	2	2	2	2	0	2	2	2
499	2	0	0	2	0	2	1	2	0	1	1	0	2	2	2	2	2	0	2	0	2	0	0	0	0	0	0	0	0	0	0	2	0	0	0	0	0	2	2	1	2	0	2	2	2	2	0	0	2
500	2	0	0	1	0	1	2	2	0	0	2	0	2	2	2	2	1	0	2	0	0	0	0	0	0	0	0	0	0	0	0	2	0	0	0	0	0	2	2	2	2	0	2	0	1	0	0	0	2
501	1	0	0	0	0	0	2	2	0	0	2	0	1	1	1	2	1	0	2	0	2	2	1	2	2	1	2	2	2	0	2	0	2	0	0	0	0	2	2	1	1	0	1	1	1	1	0	0	2
505	2	0	0	2	0	0	2	2	2	0	2	1	1	1	1	1	1	0	1	0	0	0	0	0	0	0	0	0	0	2	2	0	0	0	0	0	0	2	2	2	2	1	2	2	2	1	1	1	2
509	1	0	0	2	0	1	1	2	1	0	1	0	0	1	2	2	1	0	0	0	0	0	0	0	0	0	0	0	0	0	0	0	0	2	0	0	0	2	2	2	2	1	2	2	1	0	1	1	2
510	1	0	0	2	0	2	0	1	0	0	0	0	0	1	2	2	2	0	2	2	2	0	0	0	0	0	0	0	0	0	0	2	0	0	0	0	0	2	2	2	2	0	0	2	1	1	0	0	2
512	1	2	2	0	0	2	1	2	0	1	1	0	2	1	2	2	0	0	2	1	1	0	0	0	0	0	1	1	0	1	0	1	0	0	0	0	0	0	0	0	0	1	2	2	1	0	0	0	2
513	2	0	0	0	0	0	2	2	0	0	2	0	2	2	2	2	2	0	2	0	0	0	0	0	0	0	0	0	0	0	1	1	0	0	0	0	0	2	2	2	2	1	2	2	1	0	0	0	2
514	0	0	2	0	0	1	1	1	0	0	1	0	0	0	2	2	0	0	2	0	0	0	0	0	0	0	0	0	0	1	0	2	0	0	0	0	0	0	0	2	2	0	2	2	1	0	0	0	2
516	2	0	1	2	0	2	0	2	0	0	0	0	0	0	0	0	0	0	0	0	0	0	0	0	0	0	0	0	0	0	0	2	0	0	0	0	0	2	2	2	2	0	2	2	1	0	0	0	2
517	2	0	0	2	0	1	0	2	0	0	0	0	0	0	0	0	0	0	0	1	0	0	0	0	0	0	0	0	0	0	0	2	0	0	0	0	0	2	2	2	0	0	2	2	2	2	0	0	2
521	2	0	0	2	0	2	0	0	0	0	0	0	2	2	2	2	2	0	2	0	0	0	0	0	0	0	0	0	0	0	2	2	0	0	1	0	0	2	2	2	2	0	0	0	0	0	0	0	2
522	2	0	0	2	1	0	2	2	1	0	2	0	2	2	2	2	2	0	2	0	0	0	0	0	0	0	0	0	0	0	0	2	0	0	0	0	0	2	2	2	2	0	2	2	2	0	0	0	2
525	2	0	0	1	0	2	0	1	0	0	0	0	0	0	2	1	0	0	2	0	0	0	0	0	0	0	0	0	0	0	0	2	1	0	0	0	2	2	2	2	0	0	2	0	1	0	0	0	2
528	2	0	0	2	1	2	0	2	0	0	0	2	2	2	2	2	2	0	2	0	0	0	0	0	0	0	0	0	0	0	0	2	1	0	1	1	0	2	2	2	2	0	2	2	1	0	0	0	2
529	2	0	0	2	2	0	1	2	1	0	1	0	0	0	2	2	0	2	2	1	0	0	1	1	1	1	0	0	0	0	0	2	0	0	0	0	0	2	1	2	2	0	2	2	2	2	0	0	2
530	2	0	0	2	0	1	1	2	0	0	1	0	2	1	2	2	0	0	2	1	1	1	0	0	0	0	0	0	0	2	2	0	0	2	1	1	1	0	2	2	2	0	0	0	0	0	0	0	1
531	0	0	0	0	0	0	2	2	0	0	2	0	1	1	1	2	1	0	2	2	2	2	2	2	2	2	2	2	2	0	0	2	2	1	2	2	2	2	2	2	2	2	2	2	2	0	2	2	1
532	1	0	0	1	0	0	2	2	0	0	2	0	0	0	0	2	0	0	2	0	0	0	0	2	2	1	2	2	2	0	1	1	1	0	0	0	0	2	2	2	2	0	1	1	1	0	0	0	2
533	2	0	0	0	0	2	0	2	0	0	0	0	0	0	2	2	0	1	2	0	2	0	0	0	0	0	0	0	0	0	0	2	0	0	0	0	0	2	2	2	2	0	0	0	1	0	0	0	2
534	0	0	0	1	0	2	0	2	0	0	0	0	0	0	2	2	0	2	2	0	0	0	0	0	0	0	0	0	0	0	0	2	0	0	0	0	0	2	2	2	2	0	0	0	0	0	0	0	2
535	2	0	0	0	2	2	1	2	0	1	0	2	2	2	2	2	2	0	2	0	0	0	1	0	0	0	1	1	1	0	0	2	0	0	0	0	0	2	2	2	2	0	2	2	2	0	0	0	2
536	0	0	0	2	0	1	1	2	0	0	0	0	0	0	1	1	0	1	1	0	0	0	0	0	0	0	0	0	0	0	0	2	0	0	1	1	0	2	2	2	2	0	0	2	1	0	0	0	2
537	2	0	0	2	0	2	2	2	0	0	2	0	2	2	2	2	2	0	2	0	0	0	0	0	0	0	0	0	0	0	0	1	0	0	0	0	0	2	2	1	1	0	2	0	1	0	0	0	2
541	0	0	0	2	0	1	1	2	0	0	1	0	0	0	1	2	0	1	2	0	0	0	0	0	0	0	0	0	0	0	0	2	0	0	0	0	0	2	2	2	2	1	2	2	2	1	1	1	2
542	1	0	0	2	0	2	0	2	0	0	0	0	2	2	2	2	2	0	2	2	2	0	0	0	0	0	0	0	0	0	0	2	1	0	0	0	0	2	2	2	2	0	0	0	0	0	0	0	2
547	1	0	1	1	1	1	1	2	0	0	0	0	1	1	1	1	1	0	2	0	0	0	0	2	2	0	2	2	0	1	1	0	0	2	0	0	0	2	2	2	2	1	1	1	1	0	0	0	2
548	0	0	2	1	0	2	0	2	0	0	0	0	0	0	2	2	0	0	2	0	0	0	0	0	0	0	0	0	0	0	0	0	0	0	1	1	0	2	2	2	1	0	1	1	0	0	0	0	2
550	0	0	0	2	0	1	1	2	0	0	1	0	1	1	2	2	1	1	2	0	0	0	0	0	0	0	2	2	2	0	0	2	1	0	0	0	0	2	2	2	2	0	0	2	1	2	0	0	2
551	2	1	2	0	0	1	1	2	0	0	2	0	2	2	2	2	2	0	2	2	2	2	0	0	0	0	0	0	0	0	0	2	0	0	0	0	0	2	2	2	2	0	0	0	0	0	0	0	2
552	2	0	1	0	0	1	1	1	0	0	1	0	1	2	2	2	2	0	1	0	0	0	0	0	0	0	0	0	0	0	0	2	0	0	0	0	0	2	1	2	2	0	0	0	0	0	0	0	2
553	2	0	0	2	0	1	1	2	0	0	1	0	0	0	0	0	0	2	2	0	0	0	0	0	0	0	0	0	0	0	0	2	0	0	0	1	0	2	2	2	2	0	2	2	2	0	0	0	2
554	2	0	0	2	0	2	2	2	0	2	2	1	1	1	2	2	1	1	2	0	0	0	0	0	0	0	0	0	0	0	0	2	0	0	1	1	0	2	2	1	1	0	2	2	2	0	2	0	2
559	0	0	0	2	0	0	1	2	0	0	1	0	0	0	0	0	0	0	0	0	0	0	0	0	0	0	0	0	0	0	0	2	0	0	0	0	0	2	2	2	0	0	2	2	0	0	0	0	2
563	2	0	0	2	0	2	0	1	0	0	0	0	2	2	2	2	2	0	2	0	0	0	0	0	0	0	0	0	0	0	0	0	1	0	0	0	0	2	2	2	2	0	2	2	2	0	0	0	2
564	2	0	1	2	0	2	0	2	0	0	0	0	2	2	2	2	2	0	2	0	2	0	0	0	0	0	0	0	0	0	0	2	0	0	0	0	0	2	2	2	1	0	2	2	2	0	0	0	2
524	2	0	0	2	0	0	1	2	0	0	1	0	0	0	2	2	0	2	2	0	0	0	1	1	1	1	0	0	2	0	0	2	2	0	0	0	0	2	2	2	2	2	2	2	2	0	2	2	2
526	2	0	0	0	0	1	1	2	0	0	1	0	0	0	1	1	0	1	1	0	0	0	1	0	0	0	1	1	1	0	0	0	0	0	0	2	0	2	2	2	2	0	2	2	1	1	0	0	2
527	2	0	0	1	0	2	0	1	0	0	0	0	2	2	2	2	1	0	2	0	0	0	0	0	0	0	0	0	0	0	0	2	0	0	0	0	0	2	2	2	2	0	1	1	0	0	0	0	2
538	2	0	0	0	1	2	1	0	0	0	2	0	0	1	2	2	1	0	2	0	0	0	0	0	0	0	0	0	0	0	0	2	2	0	1	1	1	2	2	2	2	2	2	2	2	0	2	2	2
539	1	0	1	2	0	2	0	2	0	0	0	0	0	1	2	2	0	0	2	0	0	0	0	0	0	0	0	0	0	0	0	1	1	0	0	0	0	0	0	0	2	1	1	1	1	0	1	1	1
540	1	0	0	2	0	2	1	2	0	0	1	0	1	1	1	1	1	0	1	0	0	0	0	0	0	0	0	0	0	0	0	2	0	0	0	0	0	2	2	2	2	0	2	2	2	2	0	0	2
543	0	0	0	2	0	0	2	2	0	0	2	0	1	1	1	1	1	0	1	0	0	0	0	0	0	0	0	0	0	0	0	0	1	0	1	1	0	0	0	0	0	0	1	1	0	0	0	0	2
544	2	0	0	0	0	2	0	2	0	0	0	0	0	0	2	2	0	0	2	2	2	0	0	0	0	0	0	0	0	0	0	2	0	0	0	0	0	2	2	2	2	0	1	1	1	1	0	0	2
545	2	0	0	2	0	0	2	2	1	0	2	0	0	1	0	2	0	0	2	0	0	0	0	0	0	0	0	0	0	0	0	0	0	0	0	0	0	2	2	2	2	0	2	2	2	2	0	0	2
546	1	0	0	2	2	2	1	2	0	0	1	0	0	0	2	2	0	2	2	0	2	0	0	0	0	0	0	0	0	0	0	2	0	0	0	0	0	2	2	2	0	1	1	1	1	0	1	1	2
549	2	0	1	0	0	1	1	2	0	0	0	0	1	1	2	2	1	0	2	0	0	0	0	0	0	0	0	0	0	1	1	1	2	1	0	0	0	2	2	2	0	1	1	1	1	0	1	1	2
555	2	0	0	2	0	2	0	1	0	0	0	0	0	0	2	2	0	1	2	1	1	0	0	0	0	0	0	0	0	0	0	2	0	0	0	0	0	2	2	2	2	0	0	0	0	0	0	0	2
556	0	0	2	1	0	2	1	2	0	0	0	0	0	0	2	2	0	2	2	0	0	0	1	1	1	1	1	1	1	0	0	2	0	0	0	0	0	2	2	2	2	0	1	2	1	0	0	0	2
557	2	0	1	2	0	2	1	2	0	0	2	0	0	0	0	0	0	0	0	0	0	0	0	0	0	0	0	0	0	0	0	0	0	0	2	0	0	2	2	2	2	0	2	2	2	0	0	0	2
558	2	0	1	2	1	2	1	2	0	2	1	1	2	2	2	2	2	0	2	0	0	0	0	0	0	0	0	0	0	0	0	2	0	0	0	0	0	0	0	0	0	0	2	2	2	0	0	0	2
560	0	0	0	2	0	0	2	2	0	0	2	0	2	2	2	2	2	0	2	0	0	0	1	0	0	0	1	1	1	0	2	0	1	1	2	2	2	0	0	0	0	2	0	2	1	0	0	2	2
561	2	0	0	2	0	2	1	1	0	0	1	0	2	2	2	2	2	0	2	0	2	0	0	0	0	0	0	0	0	0	0	2	0	0	0	0	0	2	2	2	1	1	1	1	1	0	1	1	2
562	1	0	0	2	0	2	1	2	0	0	1	1	1	1	2	2	1	1	2	0	0	0	0	0	0	0	0	0	0	0	0	2	0	0	0	0	0	2	2	2	2	0	2	2	2	0	0	0	2
565	2	0	0	2	0	0	2	2	2	0	2	0	0	0	0	0	0	0	0	0	0	0	0	0	0	0	0	0	0	0	0	2	0	0	0	1	0	2	2	2	0	0	0	0	0	0	0	0	2
566	2	2	0	2	0	2	0	2	0	0	0	0	0	1	0	0	0	0	2	0	0	0	0	0	0	0	0	0	0	0	0	2	0	0	0	0	0	2	2	2	0	0	0	0	0	0	0	0	2
567	1	0	0	2	0	1	1	2	0	0	1	0	2	1	2	2	2	0	2	2	2	1	0	0	0	0	0	0	0	0	0	2	0	0	0	0	0	0	0	0	2	0	2	2	1	0	0	0	1
568	2	0	0	2	1	1	1	2	0	0	1	0	1	1	2	2	1	1	2	1	0	0	1	0	0	0	1	1	1	0	0	2	0	0	1	1	1	2	2	2	2	0	0	0	0	0	0	0	2
570	2	0	0	2	0	1	1	2	1	0	1	0	1	1	2	2	1	1	2	1	1	1	0	0	0	0	0	0	0	0	0	2	1	0	2	2	2	2	2	2	2	0	0	0	0	0	0	0	2
572	2	0	0	2	0	2	1	2	0	0	1	0	0	0	1	1	0	1	1	0	0	0	1	1	0	0	2	2	0	0	0	2	0	0	0	0	0	2	2	2	2	1	1	1	1	0	1	1	1
573	2	0	0	0	0	1	1	2	0	0	1	0	1	1	1	1	1	0	1	0	0	0	0	0	0	0	0	0	0	0	0	2	0	0	0	0	0	2	2	2	2	0	2	2	1	1	0	0	2
576	0	0	0	1	0	1	1	2	0	0	1	0	0	1	0	0	2	0	2	0	0	0	1	2	0	0	2	0	0	0	0	0	0	0	2	0	0	2	2	2	2	0	2	2	1	0	2	0	2
584	0	0	0	2	2	0	2	2	0	0	2	1	1	1	1	1	1	0	1	0	0	0	2	2	0	0	2	2	2	0	0	2	0	0	0	0	0	2	2	2	2	0	2	2	2	2	0	0	2
587	2	0	0	2	2	2	0	2	0	0	0	0	0	0	0	0	0	0	0	2	0	0	0	0	0	0	0	0	0	0	2	0	0	0	2	2	2	2	2	2	0	0	2	2	2	2	0	0	2
588	2	0	0	0	0	0	2	2	0	0	2	0	2	2	2	2	2	0	2	0	0	0	0	0	0	0	0	0	0	0	0	0	0	0	1	1	1	2	2	2	2	0	1	1	0	0	0	0	2
591	2	0	2	0	0	2	0	0	0	0	0	0	0	1	2	2	2	0	2	0	0	0	1	1	0	2	1	1	1	0	0	2	0	0	0	0	0	2	2	2	2	0	2	2	2	2	0	0	2
592	2	0	0	2	0	1	1	1	0	0	2	0	2	2	2	2	2	0	2	0	0	0	0	0	0	0	0	0	0	0	2	0	1	0	0	0	0	2	2	2	2	2	2	2	2	0	0	2	1
593	2	0	0	2	0	2	0	1	0	0	0	0	1	1	1	1	1	0	1	0	0	0	1	2	0	0	0	0	0	0	0	2	0	0	0	0	0	2	2	2	2	0	1	1	1	1	0	0	2
594	2	0	0	2	1	1	2	2	1	1	2	0	2	2	2	2	2	0	2	0	0	0	1	1	1	1	0	0	0	0	0	2	0	0	1	1	1	2	2	2	2	2	2	2	2	0	2	2	2
595	1	0	0	0	0	2	0	2	0	0	0	0	0	0	0	2	0	0	2	1	1	0	0	0	0	0	0	0	0	0	0	2	0	0	0	0	0	2	2	2	2	0	1	1	0	0	0	0	2
596	2	0	0	2	0	2	2	2	0	2	2	0	2	2	2	2	2	0	2	0	0	0	0	0	0	0	0	0	0	0	0	2	2	0	0	0	0	2	2	2	2	0	2	2	2	2	0	0	2
598	1	0	0	1	0	2	0	2	0	0	0	0	0	0	0	2	0	0	2	1	1	0	0	0	0	0	0	0	0	0	0	2	0	0	0	0	0	2	2	2	2	0	2	2	0	2	0	0	2
600	0	0	0	2	0	1	1	2	0	0	1	1	2	2	2	2	2	0	2	1	1	1	0	0	0	0	0	0	0	0	0	2	0	1	0	0	0	2	2	2	2	0	2	2	1	0	0	0	2
601	0	0	0	0	0	1	1	2	0	0	1	2	0	1	2	2	1	0	2	0	0	2	0	2	0	0	1	1	1	0	2	2	0	0	2	2	0	2	2	2	2	0	2	2	2	2	0	0	0
603	0	0	2	0	0	0	1	2	0	0	1	0	2	2	2	2	1	0	2	0	0	0	0	0	0	0	0	0	0	0	0	2	1	1	0	0	0	2	2	2	2	1	1	1	1	0	1	1	1
604	0	0	0	1	1	2	0	2	0	0	0	0	1	1	2	2	1	1	2	0	0	0	0	0	0	0	0	0	0	0	0	2	0	0	0	0	0	2	2	2	2	2	2	2	2	0	2	2	2
605	2	0	1	1	0	1	1	2	0	0	0	0	2	2	2	2	2	0	2	0	0	0	1	1	1	1	1	0	0	0	0	2	0	0	0	0	0	2	2	2	2	0	2	2	2	2	0	0	2
569	1	0	0	2	0	2	0	2	0	0	0	0	0	1	2	2	0	0	2	0	0	0	1	0	0	0	0	0	0	0	0	2	1	0	0	0	0	2	2	2	2	0	2	2	1	0	0	0	0
571	2	0	0	0	0	0	2	2	2	0	2	0	1	1	1	2	1	0	2	1	1	1	1	2	2	2	2	2	2	0	0	2	0	0	0	0	0	2	2	2	2	0	2	2	2	0	2	0	2
574	2	0	0	0	2	0	0	0	0	0	0	0	0	0	2	2	0	2	2	0	0	0	0	0	0	0	0	0	0	0	0	2	0	0	0	0	0	2	2	2	2	1	2	2	2	0	0	2	2
575	2	2	0	0	0	2	0	0	0	0	0	0	0	1	2	2	0	2	2	0	0	0	0	0	0	0	0	0	0	0	0	2	0	0	0	0	0	2	2	2	2	0	2	1	1	2	0	0	2
577	0	0	2	0	0	0	2	2	0	0	2	0	0	0	1	1	0	0	2	0	0	0	0	0	0	0	0	0	0	0	0	0	2	0	0	0	0	2	2	2	1	2	2	2	2	0	2	2	2
578	1	0	1	2	0	0	2	2	0	0	1	0	0	1	2	2	1	0	2	0	0	0	1	2	2	0	2	2	2	0	0	2	0	0	1	1	0	2	2	2	2	0	1	2	0	0	0	0	0
579	1	0	0	2	0	0	1	2	0	0	1	0	2	1	2	2	0	0	2	1	1	1	1	1	1	1	1	1	1	0	0	2	1	0	1	1	1	2	2	2	2	0	1	1	0	0	0	0	2
580	0	0	2	0	0	1	1	2	0	0	1	0	0	0	2	2	0	0	2	0	0	0	0	0	0	0	0	0	0	1	1	1	0	0	0	0	0	2	2	2	2	0	2	2	2	0	1	0	2
581	1	2	2	0	0	2	1	2	0	0	2	0	0	0	2	2	0	2	2	1	1	0	1	0	1	1	0	0	0	0	0	2	0	0	0	0	0	2	2	2	2	0	0	0	0	0	0	0	2
582	0	0	1	0	0	0	1	1	0	0	1	0	0	0	1	2	0	0	2	0	0	0	0	0	0	0	1	1	0	0	1	1	2	0	0	0	0	0	0	0	0	0	2	2	2	0	1	1	2
583	2	0	0	2	0	2	2	2	0	1	2	0	0	2	2	2	2	0	2	0	0	0	0	0	0	0	0	0	0	0	0	2	0	0	0	0	0	2	2	2	1	2	2	0	2	0	0	0	2
585	0	0	0	1	0	0	2	2	0	0	2	0	2	2	2	2	2	0	2	0	0	0	1	2	2	1	2	2	1	0	0	2	0	1	0	0	0	2	2	2	2	0	2	2	1	0	0	0	2
586	1	0	1	1	1	1	1	0	0	0	2	0	1	1	1	1	1	0	2	2	2	2	2	2	2	0	2	2	2	0	0	2	0	1	0	0	0	2	2	2	2	1	1	0	1	0	0	0	2
589	0	0	0	2	0	0	2	2	0	0	2	0	2	2	2	2	2	0	2	2	2	2	0	0	0	0	0	0	0	0	0	2	1	0	2	2	2	0	0	0	0	0	0	0	0	0	0	0	2
590	1	0	0	2	0	2	0	2	0	0	0	0	1	1	2	2	1	1	2	0	0	0	0	0	0	0	0	0	0	0	0	2	0	0	0	0	0	2	2	2	2	0	0	0	0	0	0	0	2
597	2	0	0	2	0	2	1	2	0	0	2	0	1	1	2	2	1	1	2	0	0	0	0	0	0	0	0	0	0	0	0	2	0	0	1	1	1	2	2	2	2	0	1	1	1	0	0	0	2
599	1	0	0	1	0	1	2	2	2	0	2	0	2	2	2	2	2	0	2	0	0	0	1	2	2	0	2	2	1	0	0	2	1	2	0	0	2	0	2	2	1	0	0	0	0	0	0	0	2
602	2	0	1	0	0	2	0	2	0	0	0	0	1	1	2	2	1	1	2	0	0	0	0	0	0	0	0	0	0	0	0	2	0	0	0	0	0	0	0	0	0	0	0	0	0	0	0	0	2
606	2	0	0	2	0	2	1	2	0	0	0	1	2	2	2	2	2	0	2	2	2	0	0	0	0	0	2	2	2	0	0	2	0	0	0	0	0	2	2	2	2	0	2	2	2	0	0	0	2
607	2	0	0	2	0	2	1	1	0	1	1	0	2	2	2	2	0	0	2	0	0	0	1	1	1	1	1	1	1	0	0	2	0	0	0	0	0	2	2	2	2	0	1	1	1	1	0	0	2
608	2	0	0	1	0	2	1	2	1	0	1	2	2	2	2	2	2	0	2	2	0	0	2	2	2	2	0	0	0	0	0	2	0	0	0	0	0	2	2	2	2	2	2	2	2	0	2	2	2
609	2	0	0	2	0	2	1	1	0	0	1	0	0	0	2	2	0	1	2	0	0	0	0	0	0	0	0	0	0	0	0	2	0	0	0	0	0	0	2	2	2	2	2	2	2	0	0	2	2
613	2	0	0	2	0	2	1	2	0	1	0	0	0	0	2	2	0	1	2	0	0	0	0	0	0	0	0	0	0	0	2	2	0	0	0	0	0	2	2	2	2	0	0	0	0	0	0	0	2
616	2	0	0	2	1	0	1	2	1	0	1	0	2	2	2	2	2	0	2	0	0	0	1	0	2	0	0	0	0	0	0	2	0	0	0	0	0	2	2	2	2	2	2	2	2	0	2	0	0
617	1	2	2	0	0	2	0	2	0	0	0	0	2	2	2	2	2	0	1	1	1	1	0	0	0	0	0	0	0	0	0	2	0	0	0	0	0	0	0	2	2	1	2	2	2	0	1	1	0
618	2	0	0	2	0	2	0	2	0	0	0	0	2	2	2	2	2	0	2	0	0	0	0	0	0	0	1	1	1	0	0	2	0	0	0	0	0	2	2	2	2	1	1	1	1	0	1	1	0
620	2	0	0	2	0	2	1	2	1	0	1	0	0	0	2	2	0	0	2	1	1	0	0	0	0	0	0	0	0	0	0	2	0	0	0	0	0	2	2	2	2	1	2	2	2	0	1	1	2
622	2	0	0	2	0	1	2	2	1	1	2	0	0	0	2	2	0	2	2	1	1	0	2	2	2	2	0	0	0	0	0	2	2	0	0	0	0	2	2	2	0	2	2	2	0	0	0	0	2
625	2	0	0	2	0	2	2	2	0	0	2	0	1	1	2	2	1	1	2	2	2	0	0	0	0	0	0	0	0	2	0	2	0	0	0	0	0	2	2	2	2	0	2	2	2	2	0	0	2
626	0	0	0	0	0	0	1	2	0	0	0	0	1	1	1	2	1	0	2	1	1	1	0	1	1	0	1	1	1	0	2	0	0	1	1	0	0	2	2	2	2	0	0	0	0	0	0	0	2
627	2	0	2	2	0	2	0	2	0	0	0	0	2	2	2	2	2	0	2	0	0	0	0	0	0	0	0	0	0	0	0	2	0	0	0	0	0	2	2	2	2	0	2	2	2	2	0	0	2
628	2	0	0	2	0	2	1	2	0	1	1	0	0	1	0	2	2	0	2	0	0	0	0	0	0	0	0	0	0	0	0	2	0	0	0	2	0	2	2	2	2	0	2	2	2	0	0	0	2
631	1	0	2	2	0	1	1	2	1	0	1	0	2	1	2	2	0	0	2	2	0	0	2	2	2	2	2	2	2	0	0	2	1	0	0	0	0	2	2	2	2	2	2	2	2	0	1	1	2
632	2	0	0	2	0	0	2	2	0	0	2	0	1	1	1	1	1	0	1	0	0	0	0	0	0	0	0	0	0	2	2	0	0	0	0	0	0	2	2	2	2	0	2	2	1	1	0	0	2
633	2	0	0	1	0	2	1	2	0	1	1	0	0	0	1	1	0	0	1	0	0	0	0	0	0	0	0	0	0	0	0	0	0	0	0	0	0	2	2	2	2	0	2	2	1	0	0	0	2
634	2	0	0	1	1	1	1	2	1	0	1	0	2	2	2	2	2	0	2	0	0	0	1	2	0	0	1	1	1	0	0	2	0	0	0	0	0	2	2	2	2	1	2	2	2	0	1	1	2
636	0	0	0	1	1	2	1	2	0	0	1	0	0	1	2	2	0	0	2	0	0	0	0	1	1	0	1	2	2	0	0	2	2	0	2	2	2	0	2	2	2	0	1	1	1	0	0	0	2
638	2	0	0	0	0	2	0	0	0	0	0	0	0	1	2	2	2	0	2	0	0	0	1	0	0	0	0	2	2	0	0	2	0	0	0	0	0	0	0	2	2	0	2	2	2	2	0	0	2
639	0	0	0	2	0	1	1	2	0	0	2	0	2	1	2	2	0	1	2	2	2	2	1	1	1	1	1	1	1	0	0	2	2	1	1	1	0	2	2	2	2	0	2	2	1	0	0	0	1
610	2	0	0	2	0	2	0	1	0	0	0	0	1	1	2	2	1	1	2	0	0	0	0	0	0	0	0	0	0	0	0	2	1	0	0	0	0	2	2	2	2	0	2	0	1	0	0	0	2
611	2	0	0	2	0	1	2	2	0	1	2	0	2	2	2	2	2	0	2	0	0	0	0	0	0	0	0	0	0	0	0	2	0	0	0	0	0	2	2	2	1	1	2	2	2	0	0	0	2
612	0	0	2	0	0	0	2	2	0	0	2	0	0	0	2	2	0	0	2	2	0	0	0	0	0	0	0	0	0	0	0	2	2	0	0	0	0	0	0	2	0	0	0	0	0	0	0	0	2
614	2	0	0	2	1	1	1	2	0	0	2	0	2	2	2	2	2	0	2	1	1	0	0	0	0	0	0	0	0	0	0	2	0	0	0	0	0	2	2	2	2	0	2	0	0	0	0	0	2
615	0	0	2	0	0	0	2	2	0	0	2	0	0	0	1	2	0	0	2	0	0	1	0	0	0	0	0	0	0	1	1	1	1	1	0	1	2	2	2	2	2	2	0	0	0	0	0	0	2
619	1	0	0	2	0	0	1	2	0	0	1	0	2	2	2	2	2	0	2	1	1	1	0	1	1	1	0	1	0	1	1	1	1	2	0	0	0	2	2	2	2	1	1	1	1	0	1	1	1
621	2	0	0	2	0	2	0	2	0	0	0	0	0	0	0	0	0	0	0	0	0	0	2	2	0	0	2	2	2	0	0	2	0	0	0	0	0	2	2	2	2	0	2	2	2	2	0	0	2
623	0	0	1	0	0	0	2	2	0	0	2	0	0	0	1	2	0	0	2	0	0	0	0	1	1	0	1	1	0	0	2	0	2	0	0	0	2	0	0	0	0	1	2	1	1	0	0	0	2
624	0	0	1	0	0	0	2	2	0	0	1	0	0	0	0	2	0	0	2	2	0	0	0	1	1	0	1	1	1	1	2	0	0	2	0	0	0	0	2	1	1	0	2	2	1	0	0	0	0
629	2	0	0	2	0	1	1	1	1	0	1	0	2	2	2	2	2	0	2	0	0	0	0	0	0	0	0	0	0	0	0	2	0	0	0	0	0	2	2	2	2	0	0	0	1	0	0	0	2
630	2	0	0	1	0	1	1	2	0	0	2	0	0	0	2	2	0	2	2	0	1	0	0	0	0	0	0	0	0	0	0	2	0	0	0	0	0	2	2	2	2	0	0	0	0	0	0	0	2
635	2	1	1	1	0	0	2	2	0	2	2	0	2	2	2	2	2	0	2	0	0	0	0	1	0	0	1	1	0	0	0	2	0	0	0	0	0	2	2	2	0	0	0	0	0	0	0	0	2
637	2	0	0	2	1	2	0	2	0	0	0	0	0	0	0	0	0	0	0	0	0	0	0	0	0	0	0	0	0	0	0	2	0	0	0	0	0	2	2	2	2	0	2	0	1	2	0	0	2
640	2	0	0	0	2	0	1	2	0	0	1	0	0	0	0	0	0	0	0	1	1	0	0	0	0	0	0	0	0	0	0	2	0	0	0	0	0	2	2	2	2	0	2	2	2	2	0	1	2
641	0	0	0	0	0	0	2	2	0	0	2	0	2	2	2	2	2	0	2	1	2	0	0	1	2	0	1	1	0	0	1	1	2	0	0	0	0	2	2	2	2	0	0	1	0	0	0	1	2
643	2	0	0	2	1	2	1	2	0	0	0	2	2	2	2	2	2	0	2	0	0	0	0	0	0	0	0	0	0	0	0	2	0	0	0	0	0	2	2	2	2	0	2	2	2	2	0	0	2
653	1	0	2	0	0	0	1	2	1	0	1	0	1	1	2	2	1	1	2	0	0	0	0	0	0	0	0	0	0	0	0	1	0	0	0	0	0	2	2	2	2	0	0	0	0	0	0	0	2
658	2	0	2	0	0	0	1	2	0	0	0	0	0	0	0	0	0	0	0	0	0	0	0	0	0	0	0	0	0	0	0	2	1	0	0	0	0	2	2	2	2	0	2	2	2	2	0	0	2
661	0	0	1	0	0	0	1	1	0	0	1	0	0	0	1	2	0	0	2	0	0	0	0	0	0	0	1	1	0	0	1	1	0	2	0	0	0	2	2	2	2	2	2	2	2	0	2	2	2
664	2	0	0	2	0	1	2	2	0	0	2	0	2	1	0	1	2	0	2	1	1	1	1	2	0	0	1	1	1	0	0	2	1	0	0	0	0	2	0	2	2	0	2	2	0	0	0	1	2
666	0	0	2	0	0	2	1	0	0	0	2	0	0	0	2	2	0	0	2	1	1	1	0	0	0	0	0	0	0	0	0	2	0	0	0	0	0	2	2	2	2	0	0	0	0	0	0	0	2
642	2	0	0	2	0	0	1	2	0	0	0	0	0	1	2	0	2	0	0	0	0	0	0	0	0	0	0	0	0	0	0	2	0	0	0	0	0	2	2	2	2	2	2	2	2	0	2	2	2
644	2	0	0	0	0	2	0	2	0	0	0	0	2	2	2	2	1	0	2	0	0	0	0	0	0	0	0	0	0	0	0	2	1	2	0	0	0	0	0	0	0	0	0	0	0	0	0	0	2
645	2	0	0	2	0	2	0	2	0	0	0	0	2	2	2	2	0	0	2	0	0	0	1	1	1	1	2	2	2	0	0	2	0	0	0	0	1	2	2	2	2	0	1	1	1	0	0	0	2
646	1	0	0	1	0	0	1	2	1	0	1	0	2	1	0	0	2	0	2	0	0	0	0	0	0	0	0	0	0	0	2	2	0	0	0	0	0	0	0	0	0	0	0	0	0	0	0	0	2
647	2	0	2	0	1	2	1	2	0	1	1	0	0	1	2	2	1	0	2	0	0	0	0	0	0	0	0	0	0	0	0	2	0	0	0	0	0	2	2	2	2	1	2	2	2	0	1	1	2
648	2	0	0	2	0	1	1	2	0	0	0	0	0	0	2	0	0	0	2	0	0	0	0	0	0	0	0	0	0	0	0	2	2	2	0	0	0	2	2	2	2	2	2	2	2	0	0	1	2
649	2	1	1	1	0	2	1	2	0	1	1	0	1	1	1	1	1	0	1	0	0	0	0	0	0	0	0	0	0	0	0	2	0	0	0	0	0	2	2	2	2	0	2	2	2	0	0	0	2
650	2	0	1	0	2	1	1	2	0	0	2	0	0	2	2	2	2	0	0	0	0	0	1	1	0	0	1	1	1	0	0	2	0	0	0	0	0	2	2	2	2	0	2	2	2	0	1	1	2
651	1	0	0	2	0	2	1	2	0	1	1	0	0	0	2	2	0	2	2	0	0	0	0	0	0	0	0	0	0	0	0	2	0	0	0	0	0	2	2	2	2	1	1	1	1	0	1	1	2
652	0	0	0	2	1	0	2	2	0	0	2	0	2	2	2	2	2	0	2	2	0	2	0	0	0	0	0	0	0	0	0	0	0	0	0	0	0	2	2	2	2	0	0	0	0	0	0	0	2
654	0	0	0	2	0	1	1	2	1	0	1	0	0	0	1	1	0	1	1	0	0	0	0	0	0	0	0	0	0	0	0	2	0	0	0	0	0	2	2	2	2	1	1	1	1	0	1	1	2
655	2	0	0	1	0	2	1	2	0	0	0	0	2	2	2	2	2	0	2	0	0	0	0	0	0	0	0	0	0	0	0	2	2	0	0	0	0	2	2	2	2	0	0	2	0	0	0	2	2
656	0	0	0	2	0	1	1	2	0	0	0	0	1	1	2	2	1	1	2	0	0	1	0	0	0	0	0	0	0	0	0	2	0	0	2	2	2	2	2	2	2	0	0	0	0	0	0	0	2
657	1	0	0	0	0	0	1	2	0	0	2	0	2	1	2	2	2	0	2	0	0	0	0	0	0	0	0	0	0	0	0	2	0	0	0	0	0	2	2	2	2	0	0	0	0	0	0	0	2
659	2	1	1	1	0	2	0	2	0	0	0	0	0	0	2	2	0	2	2	0	0	0	0	0	0	0	0	0	0	0	0	2	0	0	0	0	0	2	2	2	2	1	2	0	1	0	0	2	2
660	2	0	0	2	0	2	1	2	0	0	2	0	0	0	2	2	0	0	2	2	2	0	0	0	0	0	0	0	0	0	0	2	0	0	0	0	0	2	2	2	2	1	1	1	1	0	1	1	2
662	2	0	0	1	0	1	1	2	0	0	0	0	1	1	1	1	0	0	1	0	0	0	0	0	0	0	1	1	1	0	0	2	1	0	2	2	2	0	0	0	0	1	1	1	1	0	1	1	2
663	0	0	0	2	0	2	1	2	0	0	2	0	1	1	1	2	1	0	2	2	2	2	0	1	1	0	1	1	1	1	1	1	0	0	0	0	0	0	0	0	0	2	2	2	2	0	2	2	2
665	2	0	0	2	0	2	1	2	0	0	1	0	2	2	2	2	2	0	2	0	0	0	0	0	0	2	0	0	0	2	2	0	0	0	0	0	0	2	2	2	0	0	2	2	0	0	0	0	2
667	2	0	0	2	0	2	1	2	1	0	1	0	2	2	2	2	2	0	2	0	0	0	0	0	0	0	0	0	0	0	0	2	0	0	0	0	0	2	2	2	2	0	2	0	0	0	0	0	2
668	2	0	0	2	0	2	1	2	0	0	1	0	1	1	1	1	1	0	1	0	0	1	0	0	0	0	0	0	0	0	0	2	0	0	0	2	0	2	2	2	2	0	2	2	1	0	0	0	1
670	2	0	2	2	0	2	0	1	0	0	0	0	2	2	2	2	2	0	2	0	0	1	0	0	0	0	0	0	0	0	0	2	0	0	0	0	0	0	0	2	2	0	2	2	2	0	0	0	1
671	0	0	1	1	0	2	1	1	0	0	1	0	0	1	2	2	2	0	2	1	0	0	0	0	0	0	0	0	0	0	2	0	0	2	1	0	0	0	0	0	0	0	1	1	1	1	0	0	2
673	1	1	1	0	0	0	1	1	1	0	1	0	2	2	2	2	2	0	2	1	0	0	1	2	2	0	2	2	1	0	0	2	2	0	2	0	0	2	2	2	2	0	0	2	1	0	0	0	2
674	2	0	0	2	0	0	2	2	2	0	2	0	2	2	2	2	2	0	2	1	1	1	0	0	0	0	0	0	0	0	0	2	0	0	2	2	2	2	0	0	2	0	2	2	2	2	0	0	2
675	2	0	0	2	0	2	1	2	0	0	2	0	2	2	2	2	2	0	2	0	0	0	1	1	0	0	0	0	0	0	0	2	0	2	0	0	2	0	0	2	0	1	2	2	1	0	0	0	1
676	2	0	1	2	0	0	2	2	1	0	2	0	0	0	2	2	0	0	2	2	1	0	0	1	1	0	0	0	2	0	0	2	0	0	0	0	0	2	2	2	2	0	2	0	0	0	0	0	0
678	2	0	0	1	0	2	0	2	0	0	0	0	1	1	2	2	2	0	2	0	0	0	1	2	0	0	2	0	1	0	0	2	0	0	2	2	2	2	2	2	2	2	2	2	2	0	2	2	1
679	0	1	1	2	1	2	0	2	0	0	0	0	0	1	2	2	2	0	2	0	0	0	1	0	2	2	1	1	1	0	0	2	2	0	0	0	0	2	2	2	2	0	2	2	1	1	0	0	2
680	2	1	1	2	0	2	0	2	0	0	0	0	1	1	2	2	1	1	2	0	0	0	0	0	0	0	0	0	0	0	0	2	0	0	1	1	1	2	2	2	2	2	2	2	2	0	2	2	2
681	1	0	0	0	0	2	1	2	0	0	1	0	2	1	2	2	2	0	2	0	0	0	0	0	0	0	0	0	0	0	0	2	0	1	0	0	0	2	2	2	2	0	0	0	0	0	0	0	2
683	2	0	0	2	0	0	2	2	1	1	2	0	0	0	2	2	0	2	2	0	0	0	0	0	0	0	0	0	0	0	0	2	0	0	0	0	0	2	2	2	2	0	1	2	1	1	2	1	2
684	2	0	0	2	0	2	1	2	0	1	1	0	2	2	2	2	2	0	2	0	0	0	0	0	0	0	0	0	0	0	0	2	2	0	0	0	0	2	2	2	1	0	0	1	2	0	0	0	2
685	1	0	1	1	0	0	2	2	0	0	2	0	2	1	2	2	1	2	2	0	0	0	0	0	0	0	0	0	0	0	0	0	0	2	0	2	0	2	2	2	2	1	1	1	1	0	1	1	2
686	1	0	0	0	0	0	2	2	0	0	2	0	2	1	2	2	0	0	2	0	0	0	0	0	2	0	0	0	0	0	0	2	0	0	0	0	0	2	2	2	0	0	0	0	0	0	0	0	2
687	2	0	0	1	1	2	0	2	0	0	0	0	1	1	2	2	1	1	2	0	0	0	0	0	0	0	0	0	0	0	0	2	0	0	1	1	1	2	2	2	2	1	1	1	1	0	1	1	2
688	2	0	0	2	0	1	1	2	0	0	1	1	1	1	1	2	1	0	2	1	1	1	0	2	1	0	2	2	2	0	1	1	1	0	0	0	0	2	2	2	2	0	1	1	1	0	0	0	1
669	0	0	0	0	0	2	1	2	0	0	0	0	0	0	1	2	0	0	2	0	0	0	0	0	0	0	0	0	0	0	0	2	0	0	0	0	0	2	2	2	2	2	2	2	2	0	2	2	2
672	2	0	0	2	0	1	0	2	0	0	0	0	2	1	2	2	0	0	2	0	0	0	0	0	0	0	0	0	0	0	0	2	0	2	2	0	1	0	0	2	0	2	2	2	2	0	2	2	2
677	0	0	0	0	0	1	2	2	0	0	2	0	2	2	2	2	2	0	2	1	1	0	0	0	0	0	0	0	0	0	0	2	0	0	0	0	0	2	2	2	2	1	2	2	2	1	1	1	2
682	0	0	0	0	0	0	2	2	0	0	1	0	2	2	2	2	0	0	2	0	0	0	1	1	1	0	0	2	0	0	0	2	1	0	0	0	0	0	0	0	0	0	0	0	0	0	0	0	2
689	2	0	0	2	0	0	2	2	2	0	2	0	2	2	2	2	2	0	2	0	0	0	0	0	0	0	0	0	0	0	0	2	0	0	0	0	0	2	2	2	2	0	1	2	0	0	0	0	2
690	0	0	0	0	0	1	2	2	0	0	2	0	0	0	1	2	0	0	2	1	1	1	0	0	0	0	0	0	0	0	0	2	2	0	0	0	0	2	2	2	2	0	0	2	2	0	2	0	2
691	2	0	0	2	0	2	2	2	0	0	2	0	2	2	2	2	2	0	2	0	0	0	2	2	0	2	2	2	2	0	2	0	0	0	1	1	1	2	2	2	2	0	0	0	0	0	0	0	2
692	0	0	0	2	0	1	1	2	0	0	2	0	0	0	2	2	0	0	2	0	0	0	0	0	0	0	0	0	0	0	0	2	0	0	0	0	0	2	2	2	2	2	2	2	2	0	2	2	2
699	0	0	0	0	0	1	0	0	0	0	0	0	0	0	1	2	0	0	2	0	0	0	0	2	0	0	1	1	1	0	0	2	0	0	0	0	0	2	2	2	2	0	2	2	2	2	0	0	2
693	1	0	0	2	0	2	1	2	0	0	1	0	2	1	2	2	2	0	2	2	2	2	0	0	0	0	0	0	0	0	0	2	0	0	0	0	0	2	2	2	2	0	0	2	2	0	0	0	2
694	2	0	0	2	1	2	1	2	2	0	0	0	2	1	2	2	2	0	2	0	0	0	0	0	0	0	0	0	0	0	0	2	0	0	0	0	0	0	0	0	0	0	2	2	2	2	0	0	2
695	0	0	2	0	0	0	2	2	0	0	2	0	0	0	2	2	0	0	2	2	1	2	0	0	0	0	0	0	0	1	1	1	0	0	0	0	2	2	2	2	2	0	1	1	1	1	0	0	2
696	2	0	2	1	0	1	1	0	0	0	2	0	0	0	0	0	0	0	0	0	0	0	0	0	0	0	0	0	0	2	0	0	0	2	0	0	0	2	2	2	2	0	2	2	2	2	0	0	2
697	2	0	0	2	0	2	1	1	0	1	1	0	1	1	2	2	1	1	2	2	0	0	0	0	0	0	0	0	0	0	0	2	0	0	0	0	0	2	2	2	2	0	0	2	1	2	0	0	2
698	0	0	0	0	0	0	1	2	0	0	2	0	0	0	2	2	0	2	2	1	1	1	1	2	2	2	1	1	1	0	1	2	2	0	0	0	0	2	2	2	2	0	0	0	0	0	0	0	0
700	0	0	2	0	0	0	1	2	0	0	2	0	0	0	2	2	0	0	2	0	0	0	0	0	0	0	0	0	0	0	0	2	0	2	0	0	0	2	2	2	2	0	0	0	0	0	0	0	2
701	2	0	0	1	0	0	2	2	0	0	2	0	0	0	2	2	0	2	2	0	0	0	0	0	0	0	0	0	0	0	0	2	0	0	0	0	0	2	2	2	2	1	1	1	1	0	1	1	2
702	2	0	0	0	0	2	1	2	0	0	1	0	1	1	2	2	1	1	2	2	2	0	0	0	0	0	0	0	0	0	0	2	0	0	0	0	0	2	2	2	2	0	0	0	0	0	0	0	2
703	0	0	0	0	0	2	0	2	0	0	0	0	2	1	2	2	2	2	2	0	0	0	0	0	0	0	0	0	0	0	0	2	0	0	0	0	0	2	2	2	2	2	2	2	2	0	2	2	2
706	2	0	0	2	0	2	2	2	0	0	2	0	1	1	2	2	0	0	2	0	0	0	0	0	0	0	0	0	0	0	0	2	1	0	0	0	2	2	2	2	2	0	0	0	0	0	0	0	2
708	2	0	0	2	0	2	0	0	0	0	0	0	0	0	2	2	0	0	2	0	0	0	1	0	0	0	0	0	0	0	0	2	2	0	0	0	0	2	2	2	2	0	0	0	0	0	0	0	2
710	2	0	2	1	0	0	2	2	0	0	2	0	1	1	2	2	2	0	2	0	0	0	2	2	2	2	2	2	2	0	2	0	0	0	2	0	0	0	2	1	1	0	0	0	1	0	0	0	2
711	2	0	0	0	0	0	1	2	0	0	1	0	0	2	0	2	0	0	2	0	0	0	0	0	0	0	0	0	0	0	0	2	0	0	0	0	0	2	2	2	2	0	0	0	0	0	0	0	2
713	2	0	2	0	0	2	1	1	1	0	1	0	0	0	2	2	0	0	2	0	0	0	0	0	0	0	0	0	0	0	0	2	0	0	0	0	0	2	2	2	2	0	2	0	1	1	0	0	2
715	2	0	1	0	0	0	1	1	0	0	0	0	1	1	1	1	0	0	1	2	2	0	0	2	0	0	0	0	0	2	0	0	0	2	1	1	0	2	2	2	2	0	0	0	0	0	0	0	2
716	2	0	0	2	0	0	2	2	1	0	2	0	0	0	0	0	0	0	0	0	0	0	0	0	0	0	0	0	0	0	0	2	0	0	0	0	0	2	2	2	2	1	1	1	1	0	1	1	2
718	0	0	0	1	0	0	1	2	0	0	2	0	2	2	2	2	2	0	2	0	0	0	1	1	1	1	0	2	0	0	1	1	1	2	2	2	2	0	0	0	0	0	2	2	2	2	0	0	2
720	2	0	0	2	0	2	0	1	0	0	0	0	0	0	1	1	0	0	1	0	0	0	0	0	2	0	1	1	1	0	0	2	0	0	0	0	0	2	2	2	2	2	2	2	2	0	2	2	2
704	2	0	0	2	0	2	0	2	0	0	0	0	2	2	2	2	2	0	2	0	0	0	1	0	0	0	1	1	1	0	0	2	0	0	0	0	0	2	2	2	2	1	2	1	1	0	0	1	2
705	2	1	1	0	0	1	1	1	0	0	0	0	2	2	2	2	2	0	2	0	0	0	0	0	0	0	2	2	0	0	0	2	2	0	0	0	0	1	1	1	0	1	2	2	1	0	1	1	2
707	2	1	1	0	0	1	2	2	2	0	2	0	0	0	0	0	0	0	0	0	0	0	0	0	0	0	0	0	0	0	0	2	0	0	0	0	2	2	2	2	2	0	0	0	0	0	0	0	2
709	2	0	0	2	0	2	0	0	0	0	0	0	2	2	2	2	2	0	2	0	0	0	0	0	0	0	0	0	0	0	0	2	0	0	0	0	0	2	0	1	1	0	2	2	2	0	0	0	2
712	1	1	2	0	0	1	1	2	0	0	2	0	0	2	2	2	2	0	2	0	0	0	0	0	0	0	0	0	0	0	0	2	0	0	0	0	0	2	2	2	2	2	2	2	2	0	2	2	2
714	2	0	0	2	0	2	0	1	0	0	0	0	0	0	2	2	0	2	2	2	0	2	0	0	0	0	0	0	0	0	0	2	1	0	0	0	0	2	2	2	0	0	0	0	0	0	0	0	2
717	0	0	1	0	0	2	0	2	0	0	0	0	1	1	2	2	1	1	2	2	2	2	0	0	0	0	0	0	0	0	0	2	0	0	2	2	2	1	2	2	2	0	0	0	0	0	0	0	2
719	1	0	0	1	0	2	2	2	0	0	2	0	1	1	2	2	1	1	2	0	0	0	0	0	0	0	0	0	0	0	0	2	1	2	0	0	0	2	1	2	1	1	1	1	1	0	1	1	2
723	2	0	0	1	0	2	1	2	0	0	2	0	2	2	2	2	2	0	2	0	0	0	1	0	0	0	0	0	2	0	0	2	0	0	0	2	2	2	2	2	2	0	2	2	0	2	0	0	2
724	2	0	0	2	2	2	1	2	0	0	0	0	0	0	0	0	0	0	0	0	0	0	0	0	0	0	0	0	0	0	0	2	0	0	0	0	0	2	2	2	2	0	2	2	1	0	0	0	2
727	1	0	0	2	0	0	2	2	0	0	2	0	2	2	2	2	2	0	2	0	0	0	0	1	1	0	1	1	0	0	2	0	1	2	0	0	0	0	0	0	2	0	2	0	0	2	0	0	2
730	2	0	0	2	0	1	2	2	0	1	2	0	2	1	2	2	2	0	2	0	0	0	0	0	0	0	0	0	0	0	0	2	0	0	0	2	0	2	2	2	0	2	2	2	2	0	2	2	2
721	2	0	0	2	0	2	0	2	0	0	0	0	2	2	2	2	2	0	2	0	0	0	1	2	0	0	0	2	0	0	0	2	0	0	0	0	0	2	2	2	2	1	1	2	1	0	0	0	2
722	2	0	0	0	0	2	1	1	0	0	1	0	2	2	2	2	2	0	2	0	0	0	1	2	2	0	2	2	2	0	2	0	2	0	0	0	0	2	2	2	2	0	2	2	2	2	0	2	2
725	2	0	0	0	2	2	1	2	0	0	0	0	2	2	2	2	2	0	2	1	0	0	0	0	0	0	0	0	0	0	0	2	2	0	0	0	0	2	2	2	2	0	2	2	2	2	0	0	2
726	2	0	0	1	0	2	0	2	0	0	0	0	0	0	2	2	0	2	2	2	2	0	0	0	0	0	2	2	2	0	0	2	0	0	0	0	0	2	2	2	2	0	0	0	0	0	0	0	2
728	2	0	0	0	0	2	1	2	0	0	2	0	0	0	0	0	0	0	0	0	0	0	0	0	0	0	0	0	0	0	0	0	0	0	0	0	0	2	2	2	2	0	0	0	0	0	0	0	2
729	1	0	0	2	0	1	1	2	0	0	0	0	0	0	0	0	0	0	0	0	0	0	0	0	0	0	0	0	0	0	0	2	0	0	0	2	0	2	2	2	2	0	0	2	1	0	0	0	2
731	2	0	0	1	0	2	1	2	0	0	1	0	2	2	2	2	1	2	2	0	0	0	0	0	0	0	0	0	0	0	0	2	0	0	0	0	0	2	2	2	2	0	0	0	0	0	0	0	2
732	2	0	0	2	1	2	2	2	0	2	2	2	2	2	2	2	2	0	2	0	0	0	0	0	0	0	0	0	0	0	0	2	1	0	0	0	0	2	0	2	2	0	2	2	2	0	0	0	2
733	2	0	0	2	0	0	2	2	0	0	2	0	0	0	0	2	0	0	2	0	0	0	0	2	0	0	2	2	0	0	0	0	2	0	0	0	0	2	2	0	2	0	2	2	0	0	0	0	2
735	2	0	0	2	0	0	2	2	0	0	0	2	0	2	2	2	2	0	2	2	2	2	0	0	0	0	0	0	0	0	0	2	0	0	0	0	0	2	2	2	2	0	0	0	0	0	0	0	2
737	2	0	0	0	0	2	1	1	0	1	1	0	0	2	2	2	0	0	2	0	0	0	0	0	0	0	0	0	0	0	0	2	0	0	0	1	0	2	0	2	2	0	0	0	0	0	0	0	2
734	2	0	2	0	0	0	2	2	0	0	2	0	0	0	0	0	0	0	0	0	0	0	0	0	0	0	0	0	0	0	0	0	0	0	0	0	0	0	0	0	0	1	2	2	2	1	1	1	2
736	2	2	2	2	0	0	2	2	2	0	2	0	2	2	2	2	0	0	2	2	0	0	0	0	0	0	0	0	0	0	0	2	0	0	0	0	0	2	2	2	2	0	2	2	2	2	0	0	0
738	0	0	2	0	0	2	0	2	2	0	0	0	1	1	1	2	1	0	2	0	0	0	0	0	0	0	0	0	0	0	0	2	2	0	0	0	0	2	2	2	2	2	2	2	2	0	2	2	2
739	2	0	0	0	2	0	2	2	0	0	2	0	2	1	2	0	0	0	2	0	0	0	0	2	0	0	0	0	0	0	0	2	0	0	0	0	0	2	2	2	2	2	2	2	2	0	2	2	2
743	2	0	0	2	0	2	0	0	0	0	0	0	2	2	2	2	2	0	2	0	0	0	0	0	0	0	0	0	0	0	2	2	2	0	0	0	0	2	2	2	2	0	2	2	1	0	0	0	2
740	0	0	1	0	0	0	1	2	0	0	0	0	0	0	2	2	0	0	2	2	0	0	0	0	0	0	1	1	0	0	1	1	2	2	0	0	0	2	2	2	2	1	1	1	1	0	1	1	2
741	0	0	0	1	0	0	2	2	0	0	2	0	2	2	2	2	2	0	2	0	0	0	0	1	1	0	2	2	2	0	0	0	0	0	0	0	0	2	2	2	0	0	2	2	2	0	0	0	2
742	2	0	0	2	0	2	0	0	0	0	0	0	0	0	2	2	0	0	2	0	0	0	1	0	0	0	0	0	0	0	0	0	0	0	0	2	0	2	2	2	2	2	0	2	0	0	0	0	2
744	0	0	0	1	0	0	2	2	0	0	2	0	0	0	0	2	0	0	2	0	0	0	0	2	2	0	0	0	0	0	2	0	1	0	2	0	0	2	2	2	2	0	0	2	1	0	0	0	2
747	2	0	0	2	0	0	2	2	0	0	2	0	2	1	2	2	0	0	2	0	2	0	0	0	0	0	0	0	0	0	0	2	0	0	2	2	2	2	2	2	2	0	1	1	1	1	0	0	2
748	2	0	0	2	0	0	1	2	0	0	1	0	2	2	2	2	2	0	2	0	0	0	0	0	0	0	0	0	0	0	0	2	0	0	0	0	0	0	2	2	2	0	2	2	2	0	0	0	2
749	2	0	0	0	0	2	0	2	0	0	0	0	0	0	2	2	0	2	2	1	1	1	0	0	0	0	0	0	0	0	0	2	0	0	0	0	0	2	2	2	0	0	0	0	0	0	0	0	2
750	2	0	0	2	0	2	2	2	2	0	2	0	1	1	1	1	1	0	1	0	0	0	0	0	0	0	0	0	0	0	0	0	0	0	1	1	0	2	2	2	2	0	2	2	1	0	0	0	2
745	2	1	1	0	0	1	2	2	2	0	2	0	0	1	2	2	0	0	2	0	0	0	0	0	0	0	0	0	0	0	0	2	0	0	0	0	0	2	2	2	0	0	0	0	0	0	0	0	2
746	2	0	0	2	0	2	1	2	0	0	2	1	2	2	2	2	2	0	2	0	0	0	0	0	0	0	0	0	0	0	0	2	0	0	0	0	0	2	2	2	2	1	2	2	2	0	1	1	0
752	2	1	1	1	0	1	2	2	0	0	2	0	0	1	2	2	1	1	2	0	0	0	0	0	0	0	0	0	0	0	0	2	2	0	0	0	2	2	2	2	2	1	2	2	1	0	1	1	2
753	2	0	0	2	0	2	0	2	0	0	0	0	0	0	2	2	0	0	2	0	0	2	0	0	0	0	0	0	0	0	0	2	0	0	0	0	0	0	2	2	0	0	0	0	0	0	0	0	2
755	2	0	0	2	0	2	0	1	0	0	0	0	2	2	2	2	2	0	2	0	0	0	0	0	0	0	0	0	0	0	0	2	0	0	0	0	0	2	2	2	2	2	2	2	2	0	2	2	2
751	1	0	0	0	0	2	2	2	0	0	2	0	1	1	2	2	0	2	2	0	0	0	0	0	0	0	0	0	0	0	0	2	0	2	2	2	2	0	0	0	0	1	2	2	2	1	1	1	2
754	0	0	2	2	0	0	2	2	0	0	2	0	0	0	0	2	0	0	2	0	0	0	0	0	0	0	2	2	2	0	2	0	0	0	0	0	0	2	2	2	2	2	2	2	2	0	0	0	2
756	2	0	0	0	0	0	0	0	0	0	0	0	0	0	2	2	0	2	2	0	0	0	0	0	0	0	0	0	0	0	2	2	2	0	0	0	0	2	2	2	2	0	0	0	0	0	0	0	2
757	2	0	2	0	0	0	2	2	0	2	2	0	1	1	2	2	1	1	2	0	0	0	0	0	0	0	0	0	0	0	0	2	0	0	0	0	0	2	2	2	2	2	2	2	2	0	2	2	2
758	2	0	0	2	0	2	0	0	0	0	0	0	0	0	2	2	0	2	2	0	0	0	0	0	0	0	0	0	0	0	0	2	2	0	0	0	0	2	2	2	2	0	2	2	2	0	0	2	2
759	0	0	0	2	0	1	2	2	0	0	2	0	2	2	2	2	2	0	2	0	0	0	0	0	0	0	0	0	0	0	0	2	2	0	2	2	2	2	2	2	2	0	0	2	2	0	2	0	2
760	2	0	0	2	0	0	1	2	0	0	2	2	2	2	2	2	2	0	2	0	0	2	0	0	0	0	0	0	0	0	0	2	0	0	0	0	0	2	2	2	2	0	2	2	2	2	0	0	2
761	1	0	0	0	0	2	1	2	0	0	1	0	2	2	2	2	2	0	2	0	0	0	0	0	0	2	0	0	0	0	2	2	0	0	0	0	0	2	2	2	2	0	1	2	1	2	0	0	2
764	2	0	0	2	2	2	1	2	0	0	2	2	2	2	2	2	2	0	2	0	0	0	0	0	0	0	0	0	0	0	0	2	0	0	0	0	0	2	2	2	2	2	0	0	2	2	2	0	2
765	2	0	0	2	0	0	1	1	0	1	1	0	2	2	2	2	2	0	2	0	0	0	0	0	0	0	1	1	1	0	0	2	0	0	0	0	0	2	2	2	2	0	0	0	0	0	0	2	2
762	2	0	0	1	2	2	0	2	0	0	0	0	0	0	0	0	0	0	0	0	0	0	0	0	0	0	0	0	0	0	0	2	0	0	0	0	0	2	2	2	2	0	2	2	2	0	0	0	2
763	2	0	0	2	0	0	2	2	0	0	2	0	0	0	0	0	0	0	0	0	0	0	0	0	0	0	0	0	2	0	0	0	0	0	2	0	0	2	2	2	2	0	2	0	0	0	0	0	2
766	2	0	0	2	0	1	2	2	2	0	2	0	0	0	2	2	0	0	2	0	0	0	0	0	0	0	0	0	0	0	0	2	0	0	0	0	0	2	2	2	2	0	0	0	0	0	0	0	2
769	0	0	0	0	0	2	2	2	2	0	2	0	2	2	2	0	0	2	0	0	0	0	0	0	0	0	0	0	0	0	0	2	0	0	2	2	0	2	2	2	0	0	2	2	2	2	0	0	2
767	2	0	0	2	0	2	0	1	0	0	0	0	2	2	2	2	2	0	2	0	0	0	2	0	0	0	0	0	0	0	0	2	0	0	0	0	0	2	2	2	2	0	0	0	0	0	0	0	2
768	2	1	1	0	2	0	1	2	0	0	0	0	2	2	2	2	0	0	2	0	0	0	1	1	1	1	0	0	2	0	0	2	0	0	1	1	1	1	2	0	2	0	2	2	2	0	0	0	2
770	2	0	2	0	0	2	0	0	0	0	2	0	0	0	2	2	0	2	2	0	2	0	0	0	0	0	0	0	0	0	0	2	0	0	0	0	0	2	2	2	2	0	0	2	0	0	0	0	2
771	2	0	0	2	0	2	1	1	0	0	1	0	0	0	0	2	0	0	2	0	0	0	0	0	0	0	0	0	0	0	0	2	1	0	2	2	2	2	2	2	2	0	2	2	0	0	0	0	2
772	2	0	0	2	0	2	1	2	0	0	2	0	2	1	2	2	2	0	2	0	0	0	0	0	0	0	0	0	0	0	0	2	2	0	0	0	0	2	2	2	2	2	2	2	2	0	2	2	2
773	0	0	0	2	0	2	1	2	0	0	2	0	2	0	2	2	0	0	2	2	2	2	0	0	0	0	0	0	0	0	2	2	0	0	0	0	0	2	2	2	2	2	2	2	2	0	2	2	2
774	0	0	1	2	0	1	1	0	0	0	2	2	0	0	0	1	2	0	2	2	0	0	0	0	0	0	0	0	0	0	0	2	0	0	0	0	0	0	0	0	0	2	2	2	0	0	0	0	2
775	0	0	0	2	2	1	0	2	0	0	0	0	2	1	2	2	0	0	2	2	2	2	2	2	2	2	2	2	2	0	0	2	0	0	0	0	0	2	2	2	2	2	2	2	2	0	2	2	2
776	2	0	0	2	0	2	2	0	0	0	0	0	0	2	2	2	0	0	2	2	0	0	0	0	0	0	0	0	0	0	0	2	2	0	2	2	2	2	2	2	2	0	0	0	0	0	0	0	2
777	2	0	1	2	0	2	1	2	0	0	0	0	2	1	0	2	0	0	0	0	0	0	0	0	0	0	0	0	0	0	0	2	0	0	0	2	0	2	2	2	2	0	1	0	0	0	1	0	2
778	2	0	0	2	0	2	1	2	0	1	1	0	2	1	2	2	2	0	2	0	0	0	1	0	0	0	0	0	0	0	0	0	0	0	0	0	0	2	0	2	2	0	0	0	0	0	0	0	2
779	0	0	0	0	0	0	2	2	0	0	2	0	0	0	2	2	0	0	2	0	0	1	0	0	0	0	0	0	0	0	0	2	2	0	0	0	0	0	0	0	0	0	0	0	0	0	0	0	2
780	1	0	0	2	0	1	0	2	0	0	0	0	0	0	0	0	0	0	0	2	0	0	0	0	2	0	0	0	0	0	0	1	0	0	0	0	0	2	2	2	1	0	2	2	2	2	0	0	2
782	2	0	0	2	0	2	1	2	1	0	0	0	0	0	2	2	0	2	2	0	2	0	0	0	0	0	0	0	0	0	0	2	0	0	0	0	0	2	2	2	2	2	2	0	2	0	0	0	2
781	1	0	0	2	0	2	1	2	0	0	1	0	0	0	0	0	2	0	2	0	0	0	0	0	0	0	2	0	0	2	2	0	2	0	2	2	0	0	0	0	0	2	2	2	2	0	2	2	2
783	2	0	0	0	0	2	0	2	0	0	0	0	0	0	0	0	0	0	0	2	0	0	0	2	0	0	0	0	0	0	0	0	2	0	0	2	0	2	2	2	2	0	2	2	2	2	0	0	2
784	2	0	0	0	0	2	0	2	0	0	0	0	2	0	0	2	1	0	2	0	0	0	0	0	0	0	1	1	1	0	0	2	0	0	0	0	0	2	2	2	2	0	1	1	1	1	0	0	2
786	2	1	0	0	0	2	2	2	0	0	2	0	0	2	2	2	2	0	2	0	0	0	0	0	0	0	0	0	0	0	0	2	0	0	0	0	0	2	2	2	2	2	2	2	2	0	2	2	2
785	2	0	0	1	1	2	0	0	0	0	0	0	0	1	2	2	0	0	2	0	0	0	1	0	2	2	2	2	2	0	0	2	0	2	0	0	0	0	0	2	2	0	2	2	2	2	0	0	2
787	2	0	0	2	0	0	2	2	2	0	2	0	2	2	2	2	2	0	2	0	2	0	2	2	2	2	2	2	2	0	2	0	2	0	0	0	2	2	2	2	2	0	0	0	0	0	0	0	2
788	2	0	0	0	0	2	0	2	0	0	0	0	0	0	0	0	0	0	0	2	0	0	0	2	0	0	0	0	0	0	0	2	2	0	0	0	0	2	2	2	2	0	0	2	2	0	1	0	2
790	2	0	0	2	0	2	2	2	0	0	2	0	0	0	2	2	0	0	2	0	0	0	0	2	2	0	2	2	2	0	0	0	1	2	0	0	0	2	2	2	2	0	2	2	1	0	0	0	2
789	2	0	0	0	0	2	2	2	0	0	0	0	0	0	2	2	0	0	2	0	2	0	0	2	2	0	0	0	0	0	0	2	0	0	0	0	0	2	2	2	2	0	2	2	0	2	0	0	2
791	2	0	0	2	0	2	0	2	0	0	2	0	2	2	2	2	2	0	2	2	0	0	0	0	0	0	1	0	0	0	0	2	0	0	2	2	2	2	2	2	2	0	0	0	0	0	0	0	2
792	2	0	0	2	0	2	0	2	0	0	0	0	2	2	2	2	1	0	2	0	0	0	0	0	0	0	0	0	0	0	0	2	0	0	0	0	0	2	2	2	2	0	2	2	0	0	0	2	2
793	2	0	0	2	0	2	2	2	0	2	0	2	2	2	2	2	2	0	2	0	0	0	0	0	2	0	0	0	0	0	0	2	0	0	0	0	0	2	2	2	2	0	2	2	2	0	0	0	2
794	0	0	0	2	0	2	1	2	0	0	1	2	0	0	2	2	0	0	0	0	0	0	0	0	0	0	0	0	0	0	0	2	0	0	0	0	2	2	2	2	2	0	1	0	1	0	0	0	2
795	2	0	0	2	0	0	2	2	0	0	2	0	0	0	0	0	0	0	0	0	0	0	0	0	0	0	0	0	0	0	0	2	0	0	0	0	0	2	2	2	0	1	2	2	2	0	1	1	2
797	2	0	2	0	0	2	0	2	0	0	0	0	2	2	2	2	0	0	2	0	0	0	0	0	0	0	0	0	0	0	0	0	0	0	2	0	0	2	2	2	2	0	0	0	2	0	0	0	2
796	2	0	0	2	0	2	1	2	0	0	0	0	0	0	2	0	0	0	2	0	0	1	0	0	2	0	0	0	0	0	0	2	2	2	0	0	0	2	2	2	0	0	2	2	2	0	0	0	2
798	2	0	0	0	2	0	2	2	0	0	0	0	0	2	2	2	0	0	2	2	2	2	0	0	0	0	0	0	0	0	0	2	0	0	2	2	0	2	2	2	2	2	2	2	2	0	2	2	2
799	2	0	0	2	0	0	2	2	0	0	2	0	0	0	2	0	2	0	2	0	0	0	0	0	0	0	0	0	0	0	0	2	2	0	0	0	0	2	2	2	2	0	0	0	0	0	0	2	2
800	2	0	0	2	0	2	0	2	0	0	0	0	0	0	0	2	0	0	2	1	1	1	0	0	0	0	0	0	0	0	0	2	0	0	0	0	0	0	2	2	2	2	2	2	2	0	2	2	2
802	2	0	0	0	0	2	1	2	0	0	2	0	2	0	2	2	0	0	2	0	0	0	0	0	0	0	0	0	0	2	2	0	0	0	0	2	0	0	0	0	0	0	2	2	2	2	0	0	2
801	2	0	0	2	0	0	1	2	0	0	1	0	2	0	0	2	2	0	2	0	2	0	2	2	2	2	2	2	2	0	0	2	0	0	0	0	0	2	2	2	2	1	1	1	1	0	1	1	2
[truncated: 1,974 more columns]
